# Supplementary material for: Exploring the chemistry of free CI3+: reactions with the weak Lewis bases PX3 (X = Cl–I), AsI3 and Et2O
Source: Royal Society of Chemistry journal article supplement (doi:10.1039/b711639j), 2007-01-01
Supplement: b711639j.pdf [file b711639j.pdf]

Supporting Information to

**Exploring the Chemistry of Free  $\text{Cl}_3^+$ : Reactions with the Weak  
Lewis Bases  $\text{PX}_3^+$  ( $\text{X} = \text{Cl-I}$ ),  $\text{AsI}_3$  and  $\text{Et}_2\text{O}$**

Ingo Krossing\*, Ines Raabe, Caroline Röhr

Albert-Ludwigs-Universität Freiburg, Institut für Anorganische und Analytische Chemie,  
Albertstr. 21, D-79104 Freiburg i. Br., Germany. phone: +49 761 203 6122, e-mail:  
krossing@uni-freiburg.de

## 1 Solid-state structures

### 1.1 Solid-state structure of $[\text{I}_3\text{CPI}_3]^+[\text{al-f-al}]^- \mathbf{5}$ at 150K

$\mathbf{5}$  crystallizes in the monoclinic space group  $C2/m$  with  $Z = 2$ . In this compound, the thermal displacement ellipsoids of the anion are very big, indication motion of the  $\text{CF}_3$  groups. The iodine positions of the  $\text{I}_3\text{CPI}_3^+$  cation are well defined (small ellipsoids), but the position of phosphorus and carbon are disordered. Therefore, all E-I bond lengths are nearly the same (224.02 and 224.29 pm), which is in between the C-I and the P-I bond lengths of the  $\text{I}_3\text{CPI}_3^+$  cation in  $\mathbf{3}$

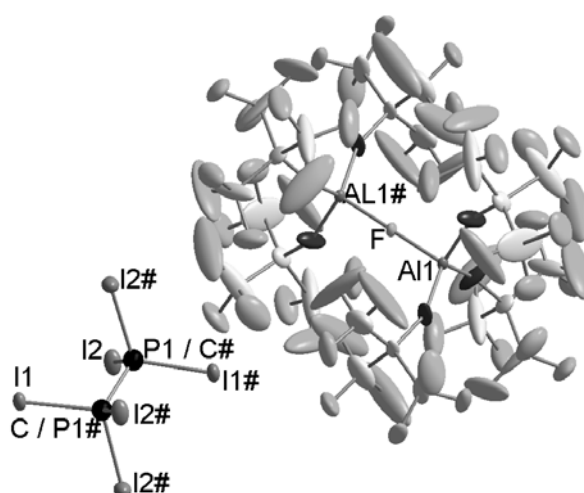

**S\_Figure 1:** Section of the solid state structure of  $[\text{I}_3\text{CPI}_3]^+[\text{al-f-al}]^- \mathbf{5}$  at 150K, thermal displacement ellipsoids showing 25% probability. The disorder of some  $\text{CF}_3$  groups is not shown for clarity. Selected bond lengths:  $d(\text{I1-P1}) = 224(4)$  pm,  $d(\text{I1-C}) = 228(5)$  pm,  $d(\text{I2-P1}) = 224(2)$  pm,  $d(\text{I2-C}) = 229(3)$  pm,  $d(\text{P1-C}) = 176(4)$  pm,  $d(\text{Al1-F}) = 176.1(3)$  pm.

## 1.2 Solid-state structure of $[\text{PI}_4]^+[\text{pftb}]^- \mathbf{6}$ at 150 K

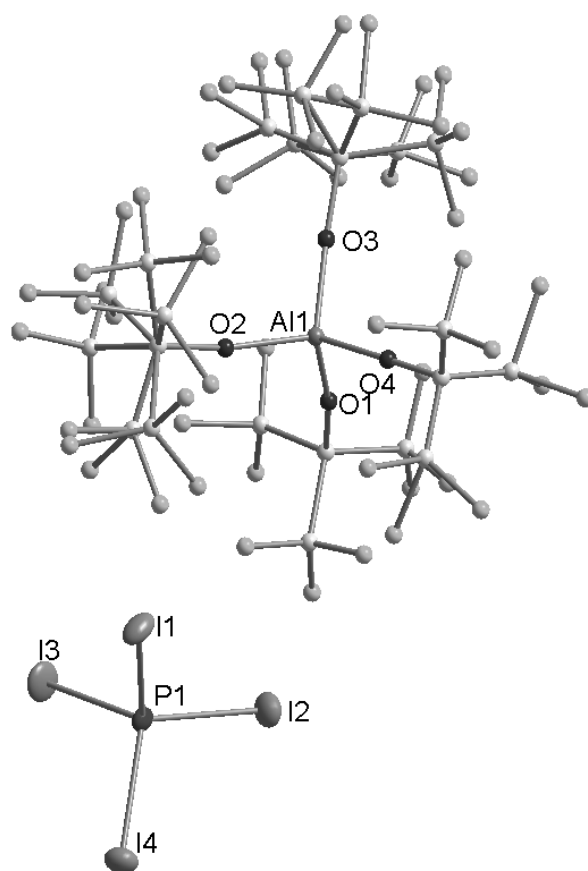

**S\_Figure 2:** Section of the solid state structure of  $[\text{PI}_4]^+[\text{pftb}]^- \mathbf{6}$  at 150K, thermal displacement ellipsoids of the cation showing 25% probability.

**S\_Table 1:** Comparison of the geometries of the  $\text{PI}_4^+$  cations in  $\mathbf{6}$  and in the other modification of  $[\text{PI}_4]^+[\text{pftb}]^-$ .

|                                         | $\mathbf{6}$ | $[\text{PI}_4]^+[\text{pftb}]^-$ Lit. <sup>[1]</sup> |
|-----------------------------------------|--------------|------------------------------------------------------|
| $d_{\min}(\text{P-I})$ [pm]             | 234.4(2)     | 237.0(1)                                             |
| $d_{\max}(\text{P-I})$ [pm]             | 236.9(1)     | 237.0(1)                                             |
| $d_{\text{av}}(\text{P-I})$ [pm]        | 235.0        | 237.0                                                |
| $\langle_{\min}(\text{I-P-I})$ [°]      | 108.8(1)     | 109.2(1)                                             |
| $\langle_{\max}(\text{I-P-I})$ [°]      | 110.4(1)     | 109.6(1)                                             |
| $\langle_{\text{av}}(\text{I-P-I})$ [°] | 109.5        | 109.4                                                |

<sup>[1]</sup> M. Gonsior, I. Krossing, L. Müller, I. Raabe, M. Jansen, L. van Wüllen, *Chem. Eur. J.* **2002**, 8, 4475.

### 1.3 Packing diagrams of **2** and **3**

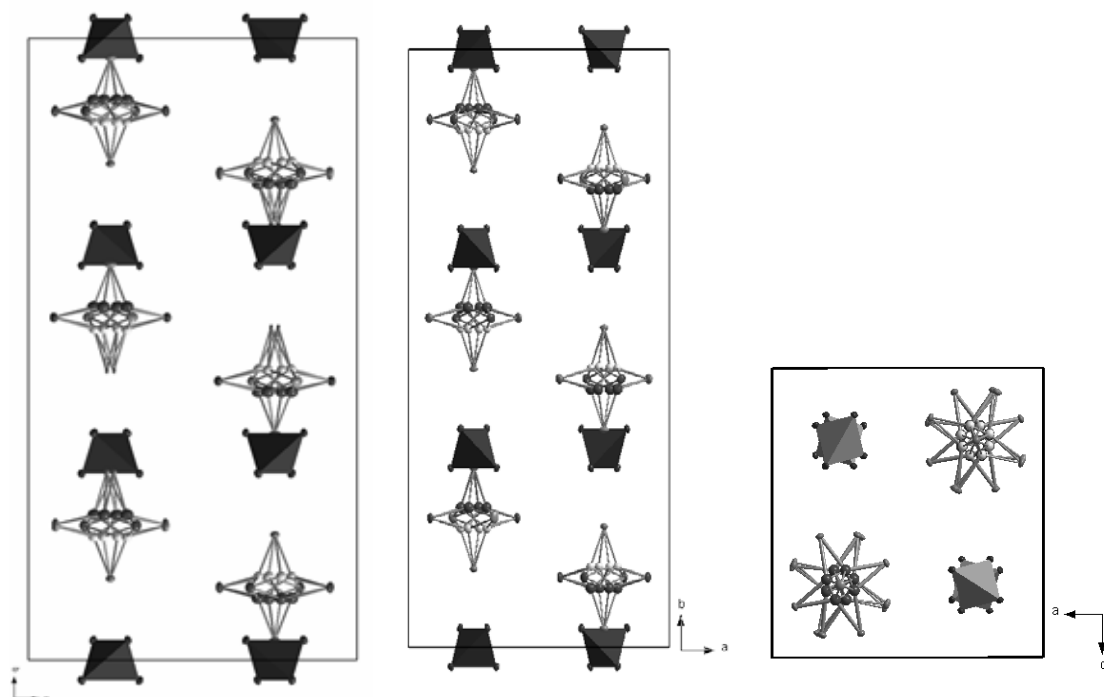

**S\_Figure 3:** Packing diagram of [I<sub>3</sub>C-PBr<sub>3</sub>]<sup>+</sup>[pftb]<sup>-</sup> **2** along the crystallographic axes. The AlO<sub>4</sub>-moieties of the anions are drawn as tetrahedra, the C(CF<sub>3</sub>)<sub>3</sub> groups have been omitted for clarity.

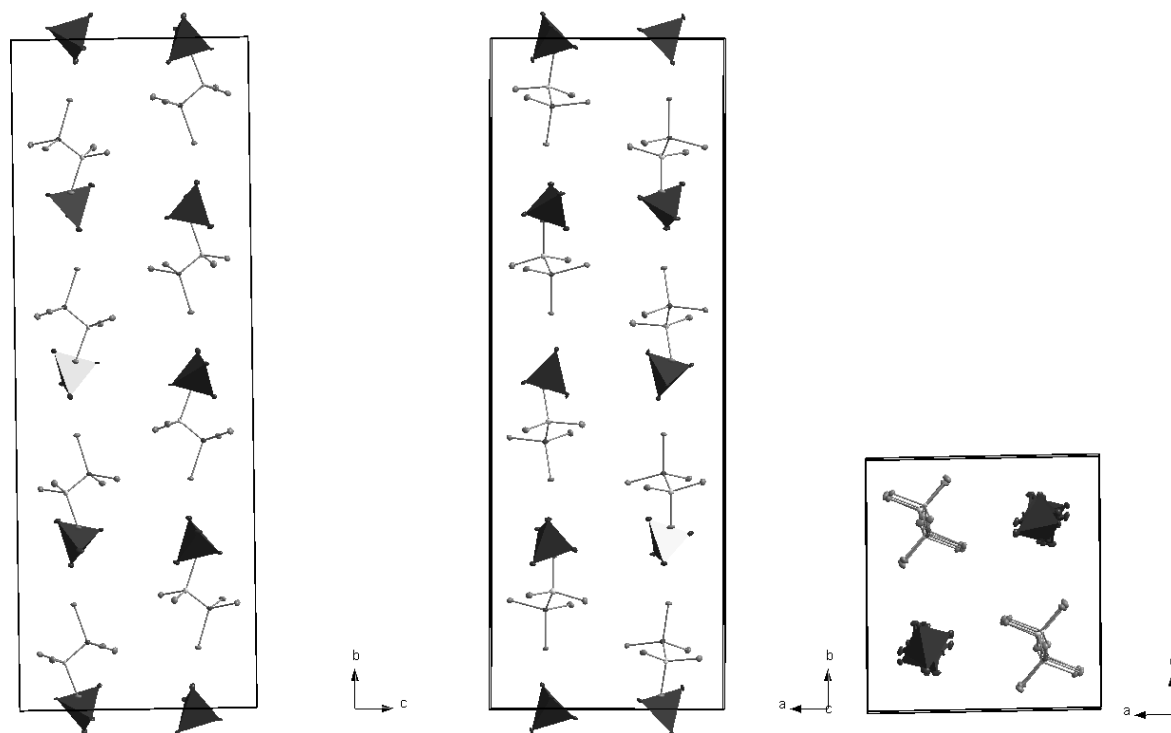

**S\_Figure 4:** Packing diagram of [I<sub>3</sub>C-PI<sub>3</sub>]<sup>+</sup>[pftb]<sup>-</sup> **3** along the crystallographic axes. The AlO<sub>4</sub>-moieties of the anions are drawn as tetrahedra, the C(CF<sub>3</sub>)<sub>3</sub> groups have been omitted for clarity.

## 1.4 Cation-anion contacts of **1**, **2** and **3**

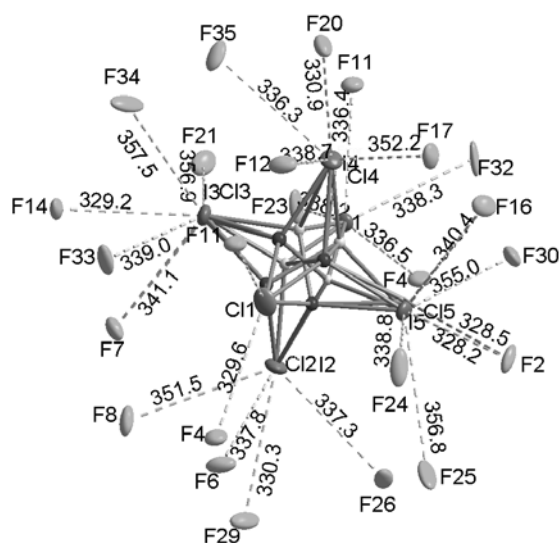

**S\_Figure 5:** Cation-anion interactions (below the sum of the van-der-Waals radii) of **1**.

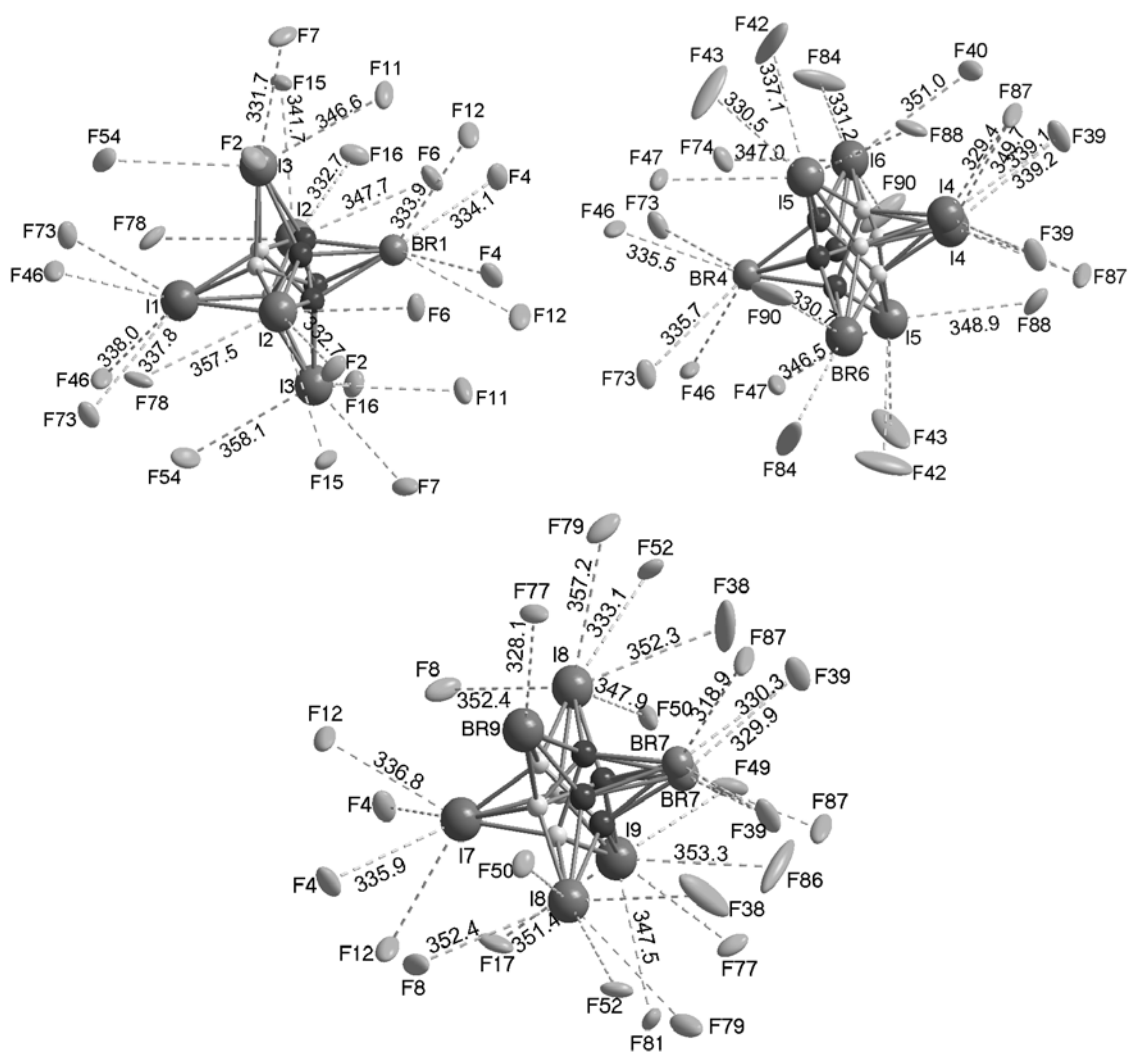

**S\_Figure 6:** Cation-anion interactions (below the sum of the van-der-Waals radii) of **2**.

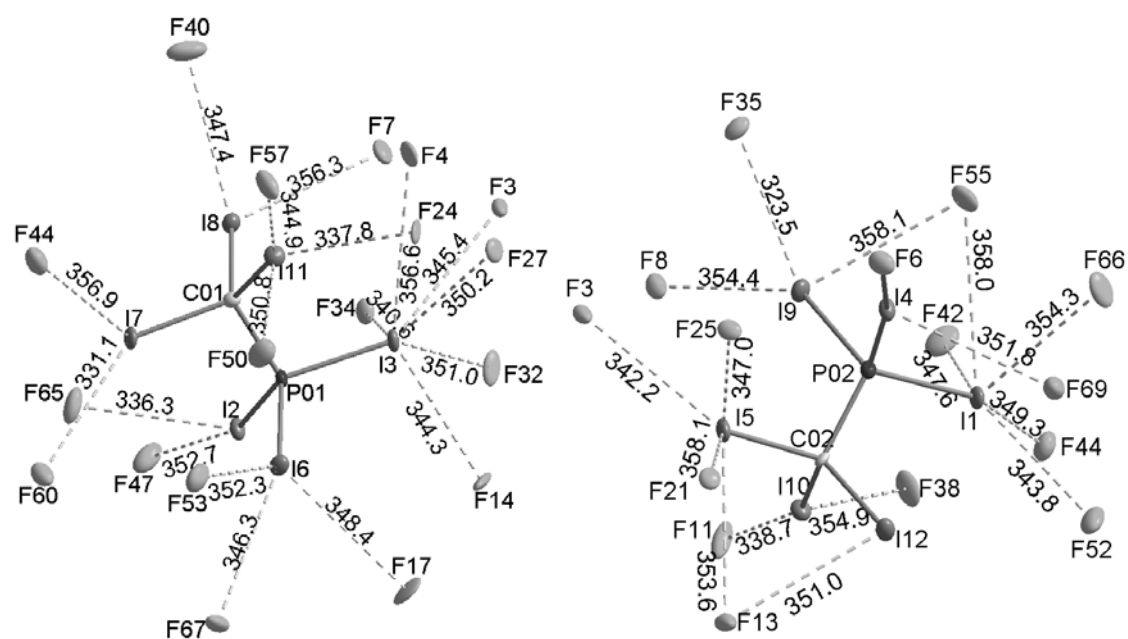

**S\_Figure 7:** Cation-anion interactions (below the sum of the van-der-Waals radii) of **3**.

## 2 Experimental and simulated IR spectra of $[\text{I}_3\text{CPBr}_3]^+[\text{pftb}]^-$ **2** and $[\text{I}_3\text{CPI}_3]^+[\text{pftb}]^-$ **3**

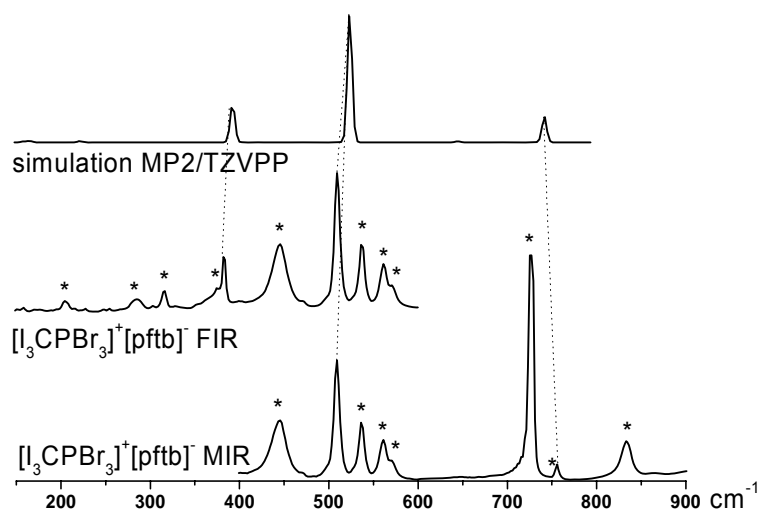

**S\_Figure 8:** Comparison of the experimental and the simulated IR spectrum of  $[\text{I}_3\text{CPBr}_3]^+[\text{pftb}]^-$  **2**. Simulation at the MP2/TZVPP level. Bands marked with \* can be assigned to the anion.

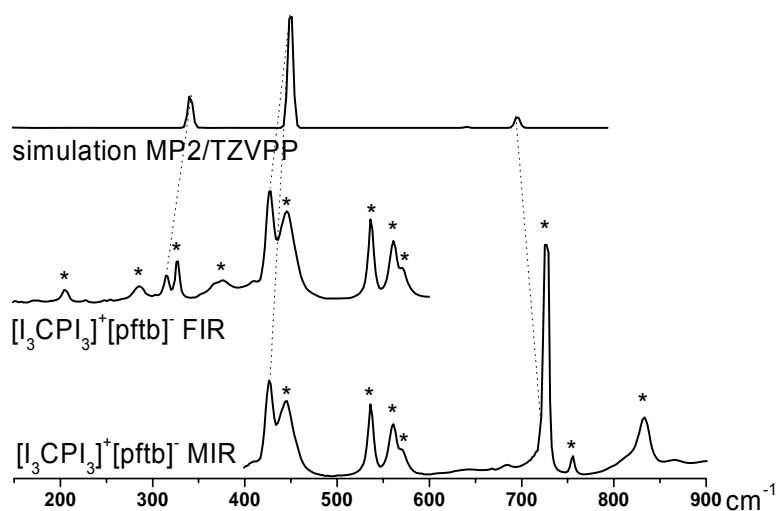

**S\_Figure 9:** Comparison of the experimental and the simulated IR spectrum of  $[\text{I}_3\text{CPI}_3]^+[\text{pftb}]^-$  **3**. Simulation at the MP2/TZVPP level. Bands marked with \* can be assigned to the anion.

### 3 Calculated structures and properties of all compounds addressed in this study

The calculations were performed with the program package TURBOMOLE with the following methods:

- *geometry optimization and vibrational frequencies*: MP2/TZVPP
- *Zero point energies*: based on (RI)BP86/SV(P) geometries
- *solvation energies*: COSMO model included in TURBOMOLE with  $\epsilon = 8.93$  (for some compounds also with  $\epsilon = 14.95$ ), based on the (RI)BP86/SV(P) geometry
- *contributions to  $H^\circ$  and  $G^\circ$* : module FreeH included in TURBOMOLE (for some compounds also  $H^{195}$  and  $G^{195}$  contributions)

For the calculated structures, the following information are given:

- picture of converged geometry
- symmetry
- xyz coordinates
- selected distances and angles
- SCF energy U
- ZPE
- vibrational frequencies (symmetry, energy, IR intensity, Raman/IR active)
- contributions to  $H^\circ$  and  $G^\circ$  (for some also  $H^{195}$  and  $G^{195}$ )
- cosmo solvation energy (if not otherwise mentioned with  $\epsilon = 8.93$ )



### CI<sub>3</sub><sup>+</sup>

sy d3h

```
c1    0.0000    0.0000    0.0000
i2    1.0101   -1.7496    0.0000
i3    1.0101    1.7496    0.0000
i4    -2.0203    0.0000    0.0000
```

```
dist 1 c -- 2 i = 3.8177 au = 202.03 pm
dist 1 c -- 3 i = 3.8177 au = 202.03 pm
dist 1 c -- 4 i = 3.8177 au = 202.03 pm
```

```
bend 2 i -> 1 c <- 3 i = 120.00 deg
```

```
cycle = 1 SCF+MP2 energy = -71.6559728131 |dE/dxyz| = 0.033253
```

```
zero point VIBRATIONAL energy : 0.0050340 Hartree
```

#### \$vibrational spectrum

| #  | mode | symmetry | wave number<br>cm**(-1) | IR intensity<br>km/mol | IR  | selection rules<br>RAMAN |
|----|------|----------|-------------------------|------------------------|-----|--------------------------|
| 1  |      |          | 0.00                    | 0.00000                | -   | -                        |
| 2  |      |          | 0.00                    | 0.00000                | -   | -                        |
| 3  |      |          | 0.00                    | 0.00000                | -   | -                        |
| 4  |      |          | 0.00                    | 0.00000                | -   | -                        |
| 5  |      |          | 0.00                    | 0.00000                | -   | -                        |
| 6  |      |          | 0.00                    | 0.00000                | -   | -                        |
| 7  | e'   |          | 116.19                  | 0.01218                | YES | YES                      |
| 8  | e'   |          | 116.19                  | 0.01218                | YES | YES                      |
| 9  | a1'  |          | 208.51                  | 0.00000                | NO  | YES                      |
| 10 | a2'' |          | 339.77                  | 9.88165                | YES | NO                       |
| 11 | e'   |          | 714.50                  | 174.27050              | YES | YES                      |
| 12 | e'   |          | 714.50                  | 174.27050              | YES | YES                      |

| T<br>(K) | p<br>(MPa) | ln(qtrans) | ln(qrot) | ln(qvib) | chem.pot.<br>(kJ/mol) | energy<br>(kJ/mol) | entropy<br>(kJ/mol/K) |
|----------|------------|------------|----------|----------|-----------------------|--------------------|-----------------------|
|----------|------------|------------|----------|----------|-----------------------|--------------------|-----------------------|

|        |           |       |       |      |        |       |         |
|--------|-----------|-------|-------|------|--------|-------|---------|
| 298.15 | 0.1000000 | 19.56 | 12.95 | 2.43 | -73.39 | 27.33 | 0.34612 |
|--------|-----------|-------|-------|------|--------|-------|---------|

| T<br>(K) | p<br>(MPa) | ln(qtrans) | ln(qrot) | ln(qvib) | chem.pot.<br>(kJ/mol) | energy<br>(kJ/mol) | entropy<br>(kJ/mol/K) |
|----------|------------|------------|----------|----------|-----------------------|--------------------|-----------------------|
|----------|------------|------------|----------|----------|-----------------------|--------------------|-----------------------|

|        |           |       |       |      |        |       |         |
|--------|-----------|-------|-------|------|--------|-------|---------|
| 195.15 | 0.1000000 | 18.50 | 12.31 | 1.44 | -39.12 | 21.27 | 0.31777 |
|--------|-----------|-------|-------|------|--------|-------|---------|

298K

#### \$cosmo\_energy

```
Total energy [a.u.] = -72.1742284258
Total energy + OC corr. [a.u.] = -72.1714229339
Total energy corrected [a.u.] = -72.1728256799 Note: incorrect value contained for downward compatibility
Dielectric energy [a.u.] = -0.0698249802
Diel. energy + OC corr. [a.u.] = -0.0670194883
```

195K

#### \$cosmo\_energy

```
Total energy [a.u.] = -72.1793757731
Total energy + OC corr. [a.u.] = -72.1763563015
Total energy corrected [a.u.] = -72.1778660373 Note: incorrect value contained for downward compatibility
Dielectric energy [a.u.] = -0.0749994955
Diel. energy + OC corr. [a.u.] = -0.0719800238
```

# Electronic excitation spectrum of , IRREP e'

```
# singlet excitations
# excitation energy / nm oscillator strength (length rep.)
0.38412838743769E+03 0.20180992550491E+00
0.30837663506003E+03 0.10666537934560E+00
0.23101293937189E+03 0.10809152654894E+00
0.19775779887009E+03 0.19690408858264E+00
0.15311078939159E+03 0.10679609475734E+01
0.12324570044327E+03 0.12973508634281E+01
0.11197157625802E+03 0.29461227417360E-01
0.10435736863926E+03 0.19619970117385E+00
0.10338123472369E+03 0.85738899362075E-02
0.98540987195099E+02 0.16249738362241E+00
0.95737117958991E+02 0.78817574695698E-03
0.94695951713175E+02 0.17319404445718E-03
0.91957365598168E+02 0.34623114625005E-04
0.90941405157512E+02 0.46683146401129E-02
0.89037575411907E+02 0.13417707823030E+00
0.86716680921432E+02 0.79446237190817E+00
0.83403160549061E+02 0.39459194527112E+00
0.81499088274334E+02 0.48356015338149E-01
0.80704367565763E+02 0.34939520551010E-02
0.78732350139171E+02 0.19807648184269E-01
# Electronic excitation spectrum of , IRREP a2"
# singlet excitations
# excitation energy / nm oscillator strength (length rep.)
0.20804309811480E+03 0.26759838044348E-03
0.19593868052092E+03 0.40385591522528E-02
0.11997426541686E+03 0.69380892030578E-01
0.10526418942147E+03 0.76476507126356E-01
0.94576025790229E+02 0.10354164226493E-03
0.93428222014711E+02 0.88540596891988E-01
0.84611578905682E+02 0.94147413141658E-02
0.81811771050116E+02 0.46917970899482E-01
0.78897821451943E+02 0.18425608687649E-01
0.74980971596471E+02 0.14205223442141E-01
0.74377098279550E+02 0.46320588825558E-01
0.73807425953477E+02 0.13310147129088E-01
0.70663059604213E+02 0.45648730941757E-01
0.68767041198319E+02 0.86209967485961E-02
0.65939290698903E+02 0.26878773008563E+00
0.64655164780430E+02 0.24849960553269E-01
0.59330568687044E+02 0.53223455964031E+00
0.57455126476470E+02 0.12923445364475E+00
0.54003867916460E+02 0.16062258508689E+01
0.51533448049211E+02 0.56768662137405E-01
```

## Et<sub>2</sub>O

sy c1

|     |         |         |         |
|-----|---------|---------|---------|
| c1  | 2.3689  | -0.3909 | 0.0004  |
| c2  | 1.1703  | 0.5278  | -0.0009 |
| o3  | 0.0000  | -0.2672 | 0.0002  |
| c4  | -1.1703 | 0.5278  | 0.0009  |
| c5  | -2.3689 | -0.3909 | -0.0005 |
| h6  | 2.3554  | -1.0279 | -0.8808 |
| h7  | 2.3570  | -1.0239 | 0.8845  |
| h8  | 3.2905  | 0.1885  | -0.0018 |
| h9  | 1.1778  | 1.1778  | 0.8818  |
| h10 | 1.1778  | 1.1752  | -0.8855 |
| h11 | -1.1776 | 1.1776  | -0.8820 |
| h12 | -1.1779 | 1.1755  | 0.8854  |
| h13 | -3.2905 | 0.1885  | 0.0010  |
| h14 | -2.3558 | -1.0276 | 0.8809  |
| h15 | -2.3566 | -1.0242 | -0.8844 |

dist 2 c -- 3 o = 2.6735 au = 141.47 pm

dist 3 o -- 4 c = 2.6735 au = 141.47 pm

bend 2 c -> 1 c <- 3 o = 34.48 deg

bend 2 c -> 3 o <- 4 c = 111.62 deg

cycle = 6 SCF+MP2 energy = -233.1833760595 |dE/dxyz| = 0.000085

zero point VIBRATIONAL energy : 0.1322514 Hartree

### \$vibrational spectrum

| #  | mode | symmetry | wave number | IR intensity | selection rules |
|----|------|----------|-------------|--------------|-----------------|
| #  |      | cm**(-1) | km/mol      | IR           | RAMAN           |
| 1  |      | 0.00     | 0.00000     | -            | -               |
| 2  |      | 0.00     | 0.00000     | -            | -               |
| 3  |      | 0.00     | 0.00000     | -            | -               |
| 4  |      | 0.00     | 0.00000     | -            | -               |
| 5  |      | 0.00     | 0.00000     | -            | -               |
| 6  |      | 0.00     | 0.00000     | -            | -               |
| 7  | a    | 96.05    | 0.00019     | YES          | YES             |
| 8  | a    | 109.43   | 3.52783     | YES          | YES             |
| 9  | a    | 187.75   | 0.53375     | YES          | YES             |
| 10 | a    | 256.84   | 0.00031     | YES          | YES             |
| 11 | a    | 262.34   | 1.48381     | YES          | YES             |
| 12 | a    | 423.85   | 3.18453     | YES          | YES             |
| 13 | a    | 433.19   | 0.01988     | YES          | YES             |
| 14 | a    | 799.18   | 0.00016     | YES          | YES             |
| 15 | a    | 809.78   | 1.25530     | YES          | YES             |
| 16 | a    | 842.72   | 6.29955     | YES          | YES             |
| 17 | a    | 932.80   | 5.30150     | YES          | YES             |
| 18 | a    | 1041.95  | 13.56078    | YES          | YES             |
| 19 | a    | 1072.12  | 2.84827     | YES          | YES             |
| 20 | a    | 1137.53  | 0.09689     | YES          | YES             |
| 21 | a    | 1148.62  | 21.54423    | YES          | YES             |
| 22 | a    | 1152.90  | 235.33110   | YES          | YES             |
| 23 | a    | 1169.71  | 14.32227    | YES          | YES             |
| 24 | a    | 1254.18  | 0.00050     | YES          | YES             |
| 25 | a    | 1257.20  | 3.92592     | YES          | YES             |
| 26 | a    | 1334.54  | 35.50492    | YES          | YES             |
| 27 | a    | 1350.31  | 0.44732     | YES          | YES             |
| 28 | a    | 1367.63  | 59.43968    | YES          | YES             |
| 29 | a    | 1408.50  | 4.48769     | YES          | YES             |

|    |   |         |           |     |     |
|----|---|---------|-----------|-----|-----|
| 30 | a | 1422.37 | 15.83609  | YES | YES |
| 31 | a | 1422.46 | 0.00647   | YES | YES |
| 32 | a | 1442.32 | 2.51490   | YES | YES |
| 33 | a | 1444.88 | 4.60587   | YES | YES |
| 34 | a | 1462.39 | 5.21375   | YES | YES |
| 35 | a | 1488.93 | 1.65661   | YES | YES |
| 36 | a | 2838.18 | 16.31184  | YES | YES |
| 37 | a | 2852.56 | 125.24295 | YES | YES |
| 38 | a | 2870.41 | 155.91962 | YES | YES |
| 39 | a | 2876.89 | 0.06566   | YES | YES |
| 40 | a | 2952.88 | 25.33710  | YES | YES |
| 41 | a | 2953.35 | 10.36275  | YES | YES |
| 42 | a | 3042.99 | 3.58424   | YES | YES |
| 43 | a | 3043.17 | 37.95169  | YES | YES |
| 44 | a | 3044.33 | 13.87157  | YES | YES |
| 45 | a | 3044.49 | 26.33338  | YES | YES |

| T<br>(K) | p<br>(MPa) | ln(qtrans) | ln(qrot) | ln(qvib) | chem.pot.<br>(kJ/mol) | energy<br>(kJ/mol) | entropy<br>(kJ/mol/K) |
|----------|------------|------------|----------|----------|-----------------------|--------------------|-----------------------|
| 298.15   | 0.1000000  | 17.06      | 11.49    | 3.46     | 267.89                | 365.31             | 0.33509               |

\$cosmo\_energy

Total energy [a.u.] = -233.4717328131  
Total energy corrected [a.u.] = -233.4716866837  
Dielectric energy [a.u.] = -0.0029265285  
Dielectric energy corr. [a.u.] = -0.0028803992

### Et<sub>2</sub>O<sup>+</sup>·I<sup>-</sup>·Cl<sub>2</sub><sup>+</sup>

sy c1

|     |         |         |         |
|-----|---------|---------|---------|
| o1  | -3.7910 | -0.1324 | 0.0423  |
| c2  | -4.4129 | 0.0175  | 1.3311  |
| i3  | -1.1987 | 0.0532  | -0.0411 |
| c4  | -4.7073 | -0.5770 | -0.9714 |
| c5  | -5.3892 | 1.1722  | 1.3870  |
| c6  | -3.9326 | -0.9444 | -2.2126 |
| c7  | 0.8268  | 0.0517  | 0.0165  |
| i8  | 1.9141  | 0.1443  | -1.6898 |
| i9  | 1.8056  | -0.1488 | 1.7800  |
| h10 | -4.8977 | -0.9263 | 1.5912  |
| h11 | -3.5925 | 0.1793  | 2.0285  |
| h12 | -5.4206 | 0.2184  | -1.1850 |
| h13 | -5.2546 | -1.4388 | -0.5820 |
| h14 | -5.7306 | 1.3028  | 2.4124  |
| h15 | -4.9100 | 2.0941  | 1.0640  |
| h16 | -6.2650 | 0.9953  | 0.7686  |
| h17 | -4.6225 | -1.2802 | -2.9840 |
| h18 | -3.2328 | -1.7536 | -2.0122 |
| h19 | -3.3886 | -0.0858 | -2.6012 |

dist 1 o -- 4 c = 2.7155 au = 143.70 pm  
dist 1 o -- 2 c = 2.7191 au = 143.89 pm  
dist 1 o -- 3 i = 4.9138 au = 260.03 pm  
dist 7 c -- 8 i = 3.8275 au = 202.54 pm  
dist 7 c -- 9 i = 3.8301 au = 202.68 pm  
bend 8 i -> 7 c <- 9 i = 118.57 deg  
bend 9 i -> 7 c <- 3 i = 120.50 deg  
bend 3 i -> 7 c <- 8 i = 120.84 deg  
bend 2 c -> 1 o <- 4 c = 112.86 deg

cycle = 28 MP2 energy = -304.8678532694 |dE/dxyz| = 0.000213

zero point VIBRATIONAL energy : 0.1386057 Hartree

#### \$vibrational spectrum

| #  | mode | symmetry | wave number | IR intensity | selection rules |
|----|------|----------|-------------|--------------|-----------------|
| #  |      | cm**(-1) | km/mol      | IR           | RAMAN           |
| 1  |      | 0.00     | 0.00000     | -            | -               |
| 2  |      | 0.00     | 0.00000     | -            | -               |
| 3  |      | 0.00     | 0.00000     | -            | -               |
| 4  |      | 0.00     | 0.00000     | -            | -               |
| 5  |      | 0.00     | 0.00000     | -            | -               |
| 6  |      | 0.00     | 0.00000     | -            | -               |
| 7  | a    | 12.56    | 0.27296     | YES          | YES             |
| 8  | a    | 20.58    | 0.82390     | YES          | YES             |
| 9  | a    | 31.55    | 0.42270     | YES          | YES             |
| 10 | a    | 36.83    | 0.23974     | YES          | YES             |
| 11 | a    | 61.40    | 0.81928     | YES          | YES             |
| 12 | a    | 94.53    | 0.93936     | YES          | YES             |
| 13 | a    | 101.26   | 0.23277     | YES          | YES             |
| 14 | a    | 123.03   | 1.83042     | YES          | YES             |
| 15 | a    | 144.16   | 2.81040     | YES          | YES             |
| 16 | a    | 149.87   | 4.45303     | YES          | YES             |
| 17 | a    | 197.50   | 7.81485     | YES          | YES             |
| 18 | a    | 231.59   | 5.90803     | YES          | YES             |
| 19 | a    | 277.74   | 1.29162     | YES          | YES             |
| 20 | a    | 321.09   | 5.73149     | YES          | YES             |
| 21 | a    | 350.46   | 10.85260    | YES          | YES             |

|    |   |         |           |     |     |
|----|---|---------|-----------|-----|-----|
| 22 | a | 373.88  | 16.68059  | YES | YES |
| 23 | a | 485.26  | 4.09671   | YES | YES |
| 24 | a | 689.82  | 119.99368 | YES | YES |
| 25 | a | 697.53  | 183.61075 | YES | YES |
| 26 | a | 771.65  | 37.11109  | YES | YES |
| 27 | a | 797.31  | 1.54341   | YES | YES |
| 28 | a | 814.80  | 27.62486  | YES | YES |
| 29 | a | 901.75  | 12.51537  | YES | YES |
| 30 | a | 1009.94 | 85.75394  | YES | YES |
| 31 | a | 1038.05 | 114.69799 | YES | YES |
| 32 | a | 1073.15 | 26.76184  | YES | YES |
| 33 | a | 1090.67 | 18.89334  | YES | YES |
| 34 | a | 1131.18 | 11.34059  | YES | YES |
| 35 | a | 1161.08 | 13.88559  | YES | YES |
| 36 | a | 1264.44 | 2.26053   | YES | YES |
| 37 | a | 1284.10 | 15.23227  | YES | YES |
| 38 | a | 1344.87 | 0.62027   | YES | YES |
| 39 | a | 1354.72 | 41.17077  | YES | YES |
| 40 | a | 1369.32 | 36.37956  | YES | YES |
| 41 | a | 1384.57 | 70.92551  | YES | YES |
| 42 | a | 1426.19 | 15.26041  | YES | YES |
| 43 | a | 1427.52 | 3.81940   | YES | YES |
| 44 | a | 1429.48 | 13.11021  | YES | YES |
| 45 | a | 1439.49 | 4.52234   | YES | YES |
| 46 | a | 1446.00 | 19.08520  | YES | YES |
| 47 | a | 1458.33 | 3.25093   | YES | YES |
| 48 | a | 2933.16 | 17.37348  | YES | YES |
| 49 | a | 2952.30 | 37.03381  | YES | YES |
| 50 | a | 2957.84 | 9.29809   | YES | YES |
| 51 | a | 2960.17 | 7.02673   | YES | YES |
| 52 | a | 2993.15 | 7.70957   | YES | YES |
| 53 | a | 3019.17 | 4.25964   | YES | YES |
| 54 | a | 3046.02 | 17.28173  | YES | YES |
| 55 | a | 3049.45 | 6.85946   | YES | YES |
| 56 | a | 3053.79 | 5.94271   | YES | YES |
| 57 | a | 3056.57 | 12.90854  | YES | YES |

T p ln(qtrans) ln(qrot) ln(qvib) chem.pot. energy entropy  
(K) (MPa) (kJ/mol) (kJ/mol) (kJ/mol/K)

298.15 0.1000000 19.82 15.85 16.55 234.46 401.44 0.56836

\$cosmo\_energy

Total energy [a.u.] = -305.6631835122

Total energy corrected [a.u.] = -305.6617238228

Dielectric energy [a.u.] = -0.0570968840

Dielectric energy corr. [a.u.] = -0.0556371947

### Et<sub>2</sub>O···Cl<sub>3</sub><sup>+</sup>

sy c1

|     |         |         |         |
|-----|---------|---------|---------|
| o1  | -0.2211 | -3.7953 | 0.0465  |
| c2  | -0.0083 | 0.8185  | 0.0094  |
| i3  | -0.0673 | 1.8120  | 1.7766  |
| i4  | 0.1267  | 1.8856  | -1.7100 |
| i5  | -0.0838 | -1.2069 | -0.0388 |
| c6  | -0.1944 | -4.3992 | 1.3520  |
| c7  | 1.1615  | -4.9641 | 1.7158  |
| h8  | -0.9698 | -5.1671 | 1.3887  |
| h9  | -0.4759 | -3.6054 | 2.0420  |
| h10 | 1.9313  | -4.1995 | 1.6288  |
| h11 | 1.1407  | -5.3130 | 2.7469  |
| h12 | 1.4338  | -5.8081 | 1.0879  |
| c13 | -0.1549 | -4.7577 | -1.0190 |
| c14 | -0.3874 | -4.0541 | -2.3329 |
| h15 | -0.9231 | -5.5129 | -0.8387 |
| h16 | 0.8196  | -5.2455 | -1.0082 |
| h17 | 0.3986  | -3.3292 | -2.5351 |
| h18 | -0.3827 | -4.7825 | -3.1410 |
| h19 | -1.3518 | -3.5500 | -2.3363 |

dist 1 o -- 13 c = 2.7161 au = 143.73 pm  
dist 1 o -- 6 c = 2.7188 au = 143.87 pm  
dist 1 o -- 9 h = 3.8185 au = 202.07 pm  
dist 1 o -- 15 h = 3.8850 au = 205.59 pm  
dist 1 o -- 8 h = 3.8930 au = 206.01 pm  
dist 1 o -- 16 h = 3.9180 au = 207.33 pm  
dist 1 o -- 14 c = 4.5338 au = 239.92 pm  
dist 1 o -- 7 c = 4.6538 au = 246.27 pm  
dist 2 c -- 3 i = 3.8328 au = 202.82 pm  
dist 2 c -- 4 i = 3.8326 au = 202.81 pm  
dist 2 c -- 5 i = 3.8312 au = 202.74 pm  
dist 1 o -- 5 i = 4.9009 au = 259.34 pm  
bend 6 c -> 1 o <- 13 c = 113.00 deg  
bend 6 c -> 1 o <- 5 i = 116.60 deg  
bend 13 c -> 1 o <- 5 i = 129.90 deg  
bend 3 i -> 1 o <- 4 i = 34.35 deg  
bend 4 i -> 1 o <- 5 i = 15.27 deg  
bend 5 i -> 1 o <- 3 i = 19.08 deg

cycle = 11 SCF+MP2 energy = -304.8682630699 |dE/dxyz| = 0.000568

zero point VIBRATIONAL energy : 0.1387550 Hartree

#### \$vibrational spectrum

| #  | mode | symmetry | wave number | IR intensity | selection rules |
|----|------|----------|-------------|--------------|-----------------|
| #  |      |          | cm**(-1)    | km/mol       | IR RAMAN        |
| 1  |      |          | 0.00        | 0.00000      | - -             |
| 2  |      |          | 0.00        | 0.00000      | - -             |
| 3  |      |          | 0.00        | 0.00000      | - -             |
| 4  |      |          | 0.00        | 0.00000      | - -             |
| 5  |      |          | 0.00        | 0.00000      | - -             |
| 6  |      |          | 0.00        | 0.00000      | - -             |
| 7  | a    |          | 16.00       | 0.12206      | YES YES         |
| 8  | a    |          | 28.26       | 0.82039      | YES YES         |
| 9  | a    |          | 33.42       | 0.51873      | YES YES         |
| 10 | a    |          | 44.92       | 0.19593      | YES YES         |
| 11 | a    |          | 55.39       | 0.03909      | YES YES         |
| 12 | a    |          | 93.71       | 1.24061      | YES YES         |

|    |   |         |           |     |     |
|----|---|---------|-----------|-----|-----|
| 13 | a | 105.67  | 0.18517   | YES | YES |
| 14 | a | 128.52  | 3.55782   | YES | YES |
| 15 | a | 137.91  | 5.10294   | YES | YES |
| 16 | a | 152.53  | 1.87475   | YES | YES |
| 17 | a | 197.98  | 7.95849   | YES | YES |
| 18 | a | 235.73  | 5.45548   | YES | YES |
| 19 | a | 273.49  | 0.11422   | YES | YES |
| 20 | a | 338.47  | 11.58786  | YES | YES |
| 21 | a | 349.87  | 8.97288   | YES | YES |
| 22 | a | 361.77  | 4.71739   | YES | YES |
| 23 | a | 497.43  | 3.22387   | YES | YES |
| 24 | a | 692.65  | 123.73346 | YES | YES |
| 25 | a | 698.21  | 183.34765 | YES | YES |
| 26 | a | 775.61  | 36.28378  | YES | YES |
| 27 | a | 799.76  | 6.65976   | YES | YES |
| 28 | a | 812.48  | 29.61801  | YES | YES |
| 29 | a | 902.55  | 12.45756  | YES | YES |
| 30 | a | 1011.19 | 78.49717  | YES | YES |
| 31 | a | 1043.09 | 109.42981 | YES | YES |
| 32 | a | 1074.90 | 34.34699  | YES | YES |
| 33 | a | 1093.06 | 25.68271  | YES | YES |
| 34 | a | 1129.63 | 17.17081  | YES | YES |
| 35 | a | 1161.13 | 8.71313   | YES | YES |
| 36 | a | 1265.26 | 2.77751   | YES | YES |
| 37 | a | 1286.18 | 14.20714  | YES | YES |
| 38 | a | 1345.85 | 0.68512   | YES | YES |
| 39 | a | 1354.61 | 53.48580  | YES | YES |
| 40 | a | 1371.49 | 35.50172  | YES | YES |
| 41 | a | 1383.27 | 61.16006  | YES | YES |
| 42 | a | 1427.27 | 13.86750  | YES | YES |
| 43 | a | 1427.88 | 3.97303   | YES | YES |
| 44 | a | 1429.61 | 15.11710  | YES | YES |
| 45 | a | 1440.71 | 6.35522   | YES | YES |
| 46 | a | 1444.59 | 8.30007   | YES | YES |
| 47 | a | 1461.04 | 3.05264   | YES | YES |
| 48 | a | 2937.52 | 17.04046  | YES | YES |
| 49 | a | 2948.81 | 37.68500  | YES | YES |
| 50 | a | 2958.41 | 6.70942   | YES | YES |
| 51 | a | 2959.37 | 8.62081   | YES | YES |
| 52 | a | 2990.60 | 12.49549  | YES | YES |
| 53 | a | 3023.20 | 3.45828   | YES | YES |
| 54 | a | 3047.82 | 7.23649   | YES | YES |
| 55 | a | 3048.52 | 13.46728  | YES | YES |
| 56 | a | 3052.46 | 7.15101   | YES | YES |
| 57 | a | 3056.72 | 12.00171  | YES | YES |

T p ln(qtrans) ln(qrot) ln(qvib) chem.pot. energy entropy  
 (K) (MPa) (kJ/mol) (kJ/mol) (kJ/mol/K)

298.15 0.100000 19.82 15.84 15.81 236.70 401.66 0.56159

\$cosmo\_energy

Total energy [a.u.] = -305.6573033423

Total energy corrected [a.u.] = -305.6558597326

Dielectric energy [a.u.] = -0.0579143595

Dielectric energy corr. [a.u.] = -0.0564707498



## Cl<sub>3</sub>OEt

sy cs

|     |         |         |         |
|-----|---------|---------|---------|
| c1  | 1.2958  | 3.8226  | 0.0000  |
| c2  | 1.4512  | 2.3236  | 0.0000  |
| o3  | 0.1205  | 1.7694  | 0.0000  |
| c4  | -0.0024 | 0.4253  | 0.0000  |
| i5  | 0.8936  | -0.5099 | 1.7815  |
| h6  | 0.7562  | 4.1510  | 0.8846  |
| h7  | 0.7562  | 4.1510  | -0.8846 |
| h8  | 2.2805  | 4.2863  | 0.0000  |
| h9  | 1.9729  | 1.9648  | -0.8874 |
| h10 | 1.9729  | 1.9648  | 0.8874  |
| i11 | 0.8936  | -0.5099 | -1.7815 |
| i12 | -2.1236 | 0.0436  | 0.0000  |

dist 3 o -- 4 c = 2.5506 au = 134.97 pm  
dist 2 c -- 3 o = 2.7240 au = 144.15 pm  
dist 4 c -- 12 i = 4.0729 au = 215.53 pm  
dist 4 c -- 5 i = 4.1621 au = 220.25 pm  
dist 4 c -- 11 i = 4.1621 au = 220.25 pm  
dist 1 c -- 3 o = 4.4707 au = 236.58 pm  
bend 4 c -> 3 o <- 2 c = 117.84 deg  
bend 5 i -> 4 c <- 11 i = 107.97 deg  
bend 5 i -> 4 c <- 12 i = 108.98 deg  
bend 11 i -> 4 c <- 12 i = 108.98 deg

cycle = 10 SCF+MP2 energy = -226.1373835945 |dE/dxyz| = 0.000168

zero point VIBRATIONAL energy : 0.0741208 Hartree

### \$vibrational spectrum

| # mode | symmetry | wave number | IR intensity | selection rules |
|--------|----------|-------------|--------------|-----------------|
| #      |          | cm**(-1)    | IR           | RAMAN           |
| 1      |          | 0.00        | 0.00000      | - -             |
| 2      |          | 0.00        | 0.00000      | - -             |
| 3      |          | 0.00        | 0.00000      | - -             |
| 4      |          | 0.00        | 0.00000      | - -             |
| 5      |          | 0.00        | 0.00000      | - -             |
| 6      |          | 0.00        | 0.00000      | - -             |
| 7      | a''      | 40.96       | 0.03478      | YES YES         |
| 8      | a'       | 79.18       | 0.18285      | YES YES         |
| 9      | a''      | 89.31       | 0.01035      | YES YES         |
| 10     | a''      | 102.56      | 6.94867      | YES YES         |
| 11     | a'       | 112.47      | 1.14276      | YES YES         |
| 12     | a'       | 126.62      | 0.53775      | YES YES         |
| 13     | a''      | 215.76      | 8.33237      | YES YES         |
| 14     | a'       | 225.46      | 7.51051      | YES YES         |
| 15     | a'       | 263.17      | 11.77575     | YES YES         |
| 16     | a''      | 276.93      | 3.84200      | YES YES         |
| 17     | a'       | 445.33      | 22.00627     | YES YES         |
| 18     | a''      | 513.99      | 275.47614    | YES YES         |
| 19     | a'       | 658.13      | 145.19256    | YES YES         |
| 20     | a''      | 800.01      | 0.01063      | YES YES         |
| 21     | a'       | 835.91      | 33.46388     | YES YES         |
| 22     | a'       | 1001.18     | 58.35690     | YES YES         |
| 23     | a'       | 1101.73     | 15.07214     | YES YES         |
| 24     | a''      | 1129.56     | 15.22666     | YES YES         |
| 25     | a'       | 1189.26     | 530.28985    | YES YES         |
| 26     | a''      | 1244.33     | 2.87173      | YES YES         |
| 27     | a'       | 1349.99     | 23.47061     | YES YES         |

|    |     |         |          |     |     |
|----|-----|---------|----------|-----|-----|
| 28 | a'  | 1381.43 | 3.22039  | YES | YES |
| 29 | a'' | 1424.45 | 10.06998 | YES | YES |
| 30 | a'  | 1441.07 | 1.42840  | YES | YES |
| 31 | a'  | 1449.55 | 8.99706  | YES | YES |
| 32 | a'  | 2950.05 | 9.25450  | YES | YES |
| 33 | a'  | 2963.97 | 10.96520 | YES | YES |
| 34 | a'' | 3007.81 | 5.47369  | YES | YES |
| 35 | a'  | 3055.24 | 5.81940  | YES | YES |
| 36 | a'' | 3059.88 | 8.94957  | YES | YES |

| T   | p     | ln(qtrans) | ln(qrot) | ln(qvib) | chem.pot. | energy   | entropy    |
|-----|-------|------------|----------|----------|-----------|----------|------------|
| (K) | (MPa) |            |          |          | (kJ/mol)  | (kJ/mol) | (kJ/mol/K) |

|        |           |       |       |      |       |        |         |
|--------|-----------|-------|-------|------|-------|--------|---------|
| 298.15 | 0.1000000 | 19.73 | 15.26 | 8.31 | 87.28 | 221.46 | 0.45837 |
|--------|-----------|-------|-------|------|-------|--------|---------|

\$cosmo\_energy

Total energy [a.u.] = -226.7592369642

Total energy corrected [a.u.] = -226.7595223122

Dielectric energy [a.u.] = -0.0058637315

Dielectric energy corr. [a.u.] = -0.0061490795

### **H(OEt)<sub>2</sub><sup>+</sup>**

sy c1

|     |         |         |         |
|-----|---------|---------|---------|
| h1  | 0.0016  | 0.0017  | -0.2860 |
| o2  | -0.0545 | 1.1936  | -0.3192 |
| o3  | 0.0576  | -1.1912 | -0.3196 |
| c4  | -1.1139 | -1.8055 | -0.9444 |
| h5  | -1.0433 | -1.5328 | -1.9932 |
| h6  | -0.9828 | -2.8803 | -0.8557 |
| c7  | 0.4968  | -1.8061 | 0.9304  |
| h8  | 1.0309  | -1.0179 | 1.4570  |
| h9  | -0.3858 | -2.0766 | 1.5072  |
| c10 | 1.3912  | -2.9869 | 0.6528  |
| h11 | 1.7465  | -3.3903 | 1.5992  |
| h12 | 2.2510  | -2.6868 | 0.0597  |
| h13 | 0.8616  | -3.7802 | 0.1314  |
| c14 | -2.4021 | -1.3264 | -0.3207 |
| h15 | -3.2371 | -1.8159 | -0.8187 |
| h16 | -2.5218 | -0.2525 | -0.4487 |
| h17 | -2.4595 | -1.5730 | 0.7371  |
| c18 | -0.4960 | 1.8067  | 0.9310  |
| h19 | 0.3863  | 2.0880  | 1.5031  |
| h20 | -1.0197 | 1.0150  | 1.4627  |
| c21 | -1.4021 | 2.9782  | 0.6524  |
| h22 | -1.7362 | 3.3993  | 1.5988  |
| h23 | -0.8875 | 3.7622  | 0.1027  |
| h24 | -2.2746 | 2.6641  | 0.0857  |
| c25 | 1.1176  | 1.8093  | -0.9412 |
| h26 | 0.9867  | 2.8839  | -0.8491 |
| h27 | 1.0479  | 1.5401  | -1.9910 |
| c28 | 2.4050  | 1.3280  | -0.3176 |
| h29 | 3.2407  | 1.8211  | -0.8109 |
| h30 | 2.4597  | 1.5690  | 0.7417  |
| h31 | 2.5260  | 0.2550  | -0.4510 |

dist 1 h-- 2 o = 2.2558 au = 119.37 pm  
dist 2 o-- 18 c = 2.7604 au = 146.07 pm  
dist 2 o-- 25 c = 2.7643 au = 146.28 pm  
dist 2 o-- 27 h = 3.8405 au = 203.23 pm  
dist 2 o-- 20 h = 3.8444 au = 203.44 pm  
dist 2 o-- 26 h = 3.8829 au = 205.47 pm  
dist 2 o-- 19 h = 3.9254 au = 207.73 pm  
dist 2 o-- 3 o = 4.5118 au = 238.75 pm  
dist 2 o-- 21 c = 4.6074 au = 243.81 pm  
dist 2 o-- 28 c = 4.6547 au = 246.32 pm  
dist 1 h-- 3 o = 2.2578 au = 119.48 pm  
dist 3 o-- 7 c = 2.7601 au = 146.06 pm  
dist 3 o-- 4 c = 2.7644 au = 146.28 pm  
dist 3 o-- 5 h = 3.8402 au = 203.21 pm  
dist 3 o-- 8 h = 3.8421 au = 203.32 pm  
dist 3 o-- 6 h = 3.8833 au = 205.49 pm  
dist 3 o-- 9 h = 3.9267 au = 207.79 pm  
dist 2 o-- 3 o = 4.5118 au = 238.75 pm  
dist 3 o-- 10 c = 4.6089 au = 243.89 pm  
dist 3 o-- 14 c = 4.6551 au = 246.34 pm  
bend 2 o-> 1 h<- 3 o = 176.79 deg

cycle = 19 SCF+MP2 energy = -466.7376868073 |dE/dxyz| = 0.000593

zero point VIBRATIONAL energy : 0.2767406 Hartree

\$vibrational spectrum

| #  | mode | symmetry | wave number<br>cm**(-1) | IR intensity<br>km/mol | IR  | selection rules<br>RAMAN |
|----|------|----------|-------------------------|------------------------|-----|--------------------------|
| 1  |      |          | 0.00                    | 0.00000                | -   | -                        |
| 2  |      |          | 0.00                    | 0.00000                | -   | -                        |
| 3  |      |          | 0.00                    | 0.00000                | -   | -                        |
| 4  |      |          | 0.00                    | 0.00000                | -   | -                        |
| 5  |      |          | 0.00                    | 0.00000                | -   | -                        |
| 6  |      |          | 0.00                    | 0.00000                | -   | -                        |
| 7  | a    |          | 7.95                    | 0.02203                | YES | YES                      |
| 8  | a    |          | 22.53                   | 0.22503                | YES | YES                      |
| 9  | a    |          | 38.25                   | 0.24366                | YES | YES                      |
| 10 | a    |          | 39.15                   | 0.25592                | YES | YES                      |
| 11 | a    |          | 50.07                   | 0.47704                | YES | YES                      |
| 12 | a    |          | 70.86                   | 0.09046                | YES | YES                      |
| 13 | a    |          | 98.81                   | 0.47980                | YES | YES                      |
| 14 | a    |          | 116.89                  | 0.80384                | YES | YES                      |
| 15 | a    |          | 125.86                  | 12.33801               | YES | YES                      |
| 16 | a    |          | 190.51                  | 0.18727                | YES | YES                      |
| 17 | a    |          | 205.11                  | 3.15778                | YES | YES                      |
| 18 | a    |          | 254.41                  | 0.10078                | YES | YES                      |
| 19 | a    |          | 255.65                  | 0.30548                | YES | YES                      |
| 20 | a    |          | 265.89                  | 0.20479                | YES | YES                      |
| 21 | a    |          | 299.08                  | 19.11484               | YES | YES                      |
| 22 | a    |          | 307.02                  | 0.15547                | YES | YES                      |
| 23 | a    |          | 409.64                  | 36.11803               | YES | YES                      |
| 24 | a    |          | 438.77                  | 3.92916                | YES | YES                      |
| 25 | a    |          | 441.69                  | 28.17351               | YES | YES                      |
| 26 | a    |          | 545.55                  | 0.57552                | YES | YES                      |
| 27 | a    |          | 725.97                  | 341.00329              | YES | YES                      |
| 28 | a    |          | 769.64                  | 1.38562                | YES | YES                      |
| 29 | a    |          | 775.48                  | 1.57364                | YES | YES                      |
| 30 | a    |          | 776.71                  | 7.26823                | YES | YES                      |
| 31 | a    |          | 804.20                  | 1.65348                | YES | YES                      |
| 32 | a    |          | 848.91                  | 1.09707                | YES | YES                      |
| 33 | a    |          | 879.98                  | 51.86624               | YES | YES                      |
| 34 | a    |          | 885.02                  | 13.24723               | YES | YES                      |
| 35 | a    |          | 945.50                  | 749.44925              | YES | YES                      |
| 36 | a    |          | 991.06                  | 1.43144                | YES | YES                      |
| 37 | a    |          | 1005.38                 | 166.78267              | YES | YES                      |
| 38 | a    |          | 1006.78                 | 126.60643              | YES | YES                      |
| 39 | a    |          | 1067.90                 | 259.44102              | YES | YES                      |
| 40 | a    |          | 1078.48                 | 10.52604               | YES | YES                      |
| 41 | a    |          | 1079.98                 | 2.41600                | YES | YES                      |
| 42 | a    |          | 1081.83                 | 19.66600               | YES | YES                      |
| 43 | a    |          | 1107.22                 | 357.86009              | YES | YES                      |
| 44 | a    |          | 1113.55                 | 1.89644                | YES | YES                      |
| 45 | a    |          | 1128.02                 | 366.59797              | YES | YES                      |
| 46 | a    |          | 1180.75                 | 2.01604                | YES | YES                      |
| 47 | a    |          | 1211.80                 | 887.66733              | YES | YES                      |
| 48 | a    |          | 1268.96                 | 0.41727                | YES | YES                      |
| 49 | a    |          | 1270.90                 | 24.66598               | YES | YES                      |
| 50 | a    |          | 1311.77                 | 257.78724              | YES | YES                      |
| 51 | a    |          | 1318.17                 | 2.14456                | YES | YES                      |
| 52 | a    |          | 1338.92                 | 0.83871                | YES | YES                      |
| 53 | a    |          | 1340.57                 | 29.09837               | YES | YES                      |
| 54 | a    |          | 1361.40                 | 1.95784                | YES | YES                      |
| 55 | a    |          | 1365.20                 | 73.50697               | YES | YES                      |
| 56 | a    |          | 1372.89                 | 112.62894              | YES | YES                      |
| 57 | a    |          | 1373.48                 | 4.59999                | YES | YES                      |
| 58 | a    |          | 1377.66                 | 0.77928                | YES | YES                      |
| 59 | a    |          | 1390.18                 | 59.97368               | YES | YES                      |

|    |   |         |            |     |     |
|----|---|---------|------------|-----|-----|
| 60 | a | 1423.19 | 98.92255   | YES | YES |
| 61 | a | 1425.68 | 11.43652   | YES | YES |
| 62 | a | 1425.99 | 5.12975    | YES | YES |
| 63 | a | 1428.87 | 6.89118    | YES | YES |
| 64 | a | 1429.79 | 5.87347    | YES | YES |
| 65 | a | 1430.61 | 2.71453    | YES | YES |
| 66 | a | 1438.29 | 5.22846    | YES | YES |
| 67 | a | 1438.92 | 1.86609    | YES | YES |
| 68 | a | 1441.66 | 2.86067    | YES | YES |
| 69 | a | 1444.56 | 45.03958   | YES | YES |
| 70 | a | 1447.80 | 5.26861    | YES | YES |
| 71 | a | 1449.34 | 0.16814    | YES | YES |
| 72 | a | 1492.84 | 23.21229   | YES | YES |
| 73 | a | 1530.95 | 1719.70082 | YES | YES |
| 74 | a | 2959.57 | 3.14396    | YES | YES |
| 75 | a | 2960.63 | 3.07977    | YES | YES |
| 76 | a | 2963.33 | 1.28775    | YES | YES |
| 77 | a | 2964.30 | 1.29476    | YES | YES |
| 78 | a | 2985.07 | 14.43281   | YES | YES |
| 79 | a | 2987.26 | 18.12771   | YES | YES |
| 80 | a | 3004.82 | 7.25677    | YES | YES |
| 81 | a | 3006.61 | 6.91487    | YES | YES |
| 82 | a | 3039.67 | 1.49711    | YES | YES |
| 83 | a | 3042.02 | 0.81918    | YES | YES |
| 84 | a | 3045.23 | 3.82330    | YES | YES |
| 85 | a | 3047.08 | 3.76347    | YES | YES |
| 86 | a | 3051.23 | 2.67870    | YES | YES |
| 87 | a | 3051.40 | 2.56383    | YES | YES |
| 88 | a | 3054.22 | 3.41770    | YES | YES |
| 89 | a | 3054.74 | 4.35505    | YES | YES |
| 90 | a | 3063.76 | 10.54731   | YES | YES |
| 91 | a | 3065.47 | 10.71284   | YES | YES |
| 92 | a | 3070.16 | 12.83862   | YES | YES |
| 93 | a | 3072.27 | 11.23406   | YES | YES |

T p ln(qtrans) ln(qrot) ln(qvib) chem.pot. energy entropy  
(K) (MPa) (kJ/mol) (kJ/mol) (kJ/mol/K)

298.15 0.1000000 18.11 14.04 17.74 602.90 767.88 0.56166

\$cosmo\_energy

Total energy [a.u.] = -467.3699098684

Total energy corrected [a.u.] = -467.3688339406

Dielectric energy [a.u.] = -0.0585212419

Dielectric energy corr. [a.u.] = -0.0574453141

## C<sub>2</sub>H<sub>4</sub>

sy d2h

|    |         |         |        |
|----|---------|---------|--------|
| c1 | 0.6662  | 0.0000  | 0.0000 |
| h2 | 1.2282  | -0.9227 | 0.0000 |
| c3 | -0.6662 | 0.0000  | 0.0000 |
| h4 | 1.2282  | 0.9227  | 0.0000 |
| h5 | -1.2282 | 0.9227  | 0.0000 |
| h6 | -1.2282 | -0.9227 | 0.0000 |

dist 1 c -- 2 h = 2.0416 au = 108.04 pm

dist 1 c -- 3 c = 2.5177 au = 133.23 pm

dist 2 h -- 4 h = 3.4872 au = 184.53 pm

bend 1 c -> 3 c <- 5 h = 121.35 deg

bend 2 h -> 1 c <- 4 h = 117.30 deg

cycle = 6 MP2 energy = -78.4005771997 |dE/dxyz| = 0.000007

zero point VIBRATIONAL energy : 0.0492616 Hartree

### \$vibrational spectrum

| #  | mode | symmetry | wave number<br>cm**(-1) | IR intensity<br>km/mol | IR  | selection rules<br>RAMAN |
|----|------|----------|-------------------------|------------------------|-----|--------------------------|
| 1  |      |          | 0.00                    | 0.00000                | -   | -                        |
| 2  |      |          | 0.00                    | 0.00000                | -   | -                        |
| 3  |      |          | 0.00                    | 0.00000                | -   | -                        |
| 4  |      |          | 0.00                    | 0.00000                | -   | -                        |
| 5  |      |          | 0.00                    | 0.00000                | -   | -                        |
| 6  |      |          | 0.00                    | 0.00000                | -   | -                        |
| 7  | b2u  |          | 801.34                  | 1.36438                | YES | NO                       |
| 8  | b2g  |          | 913.56                  | 0.00000                | NO  | YES                      |
| 9  | b3u  |          | 924.66                  | 90.63396               | YES | NO                       |
| 10 | au   |          | 1025.44                 | 0.00000                | NO  | NO                       |
| 11 | b3g  |          | 1190.41                 | 0.00000                | NO  | YES                      |
| 12 | ag   |          | 1330.69                 | 0.00000                | NO  | YES                      |
| 13 | b1u  |          | 1409.09                 | 6.57331                | YES | NO                       |
| 14 | ag   |          | 1655.65                 | 0.00000                | NO  | YES                      |
| 15 | b1u  |          | 3047.70                 | 15.74122               | YES | NO                       |
| 16 | ag   |          | 3061.35                 | 0.00000                | NO  | YES                      |
| 17 | b3g  |          | 3119.99                 | 0.00000                | NO  | YES                      |
| 18 | b2u  |          | 3143.45                 | 20.45002               | YES | NO                       |

|     |       |            |          |          |           |            |         |
|-----|-------|------------|----------|----------|-----------|------------|---------|
| T   | p     | ln(qtrans) | ln(qrot) | ln(qvib) | chem.pot. | energy     | entropy |
| (K) | (MPa) |            |          | (kJ/mol) | (kJ/mol)  | (kJ/mol/K) |         |

298.15 0.100000 15.60 6.53 0.06 74.31 137.42 0.22000

## PCl<sub>3</sub>

sy c3v

|     |         |         |         |
|-----|---------|---------|---------|
| p1  | 0.0000  | 0.0000  | 0.7361  |
| cl2 | 0.9087  | 1.5739  | -0.2144 |
| cl3 | 0.9087  | -1.5739 | -0.2144 |
| cl4 | -1.8174 | 0.0000  | -0.2144 |

dist 1 p -- 2 cl = 3.8756 au = 205.09 pm

dist 1 p -- 3 cl = 3.8756 au = 205.09 pm

dist 1 p -- 4 cl = 3.8756 au = 205.09 pm

bend 2 cl -> 1 p <- 3 cl = 100.24 deg

cycle = 3 MP2 energy = -1720.0565832920 |dE/dxyz| = 0.000001

zero point VIBRATIONAL energy : 0.0045334 Hartree

\$vibrational spectrum

| #  | mode | symmetry | wave number<br>cm**(-1) | IR intensity<br>km/mol | IR  | selection rules<br>RAMAN |
|----|------|----------|-------------------------|------------------------|-----|--------------------------|
| 1  |      |          | 0.00                    | 0.00000                | -   | -                        |
| 2  |      |          | 0.00                    | 0.00000                | -   | -                        |
| 3  |      |          | 0.00                    | 0.00000                | -   | -                        |
| 4  |      |          | 0.00                    | 0.00000                | -   | -                        |
| 5  |      |          | 0.00                    | 0.00000                | -   | -                        |
| 6  |      |          | 0.00                    | 0.00000                | -   | -                        |
| 7  | e    |          | 164.11                  | 0.21469                | YES | YES                      |
| 8  | e    |          | 164.11                  | 0.21469                | YES | YES                      |
| 9  | a1   |          | 233.72                  | 1.59721                | YES | YES                      |
| 10 | e    |          | 471.40                  | 140.93299              | YES | YES                      |
| 11 | e    |          | 471.40                  | 140.93299              | YES | YES                      |
| 12 | a1   |          | 485.21                  | 32.49310               | YES | YES                      |

| T<br>(K) | p<br>(MPa) | ln(qtrans) | ln(qrot) | ln(qvib) | chem.pot.<br>(kJ/mol) | energy<br>(kJ/mol) | entropy<br>(kJ/mol/K) |
|----------|------------|------------|----------|----------|-----------------------|--------------------|-----------------------|
|----------|------------|------------|----------|----------|-----------------------|--------------------|-----------------------|

298.15 0.1000000 17.99 11.54 1.92 -66.05 25.84 0.31650

| T<br>(K) | p<br>(MPa) | ln(qtrans) | ln(qrot) | ln(qvib) | chem.pot.<br>(kJ/mol) | energy<br>(kJ/mol) | entropy<br>(kJ/mol/K) |
|----------|------------|------------|----------|----------|-----------------------|--------------------|-----------------------|
|----------|------------|------------|----------|----------|-----------------------|--------------------|-----------------------|

195.15 0.1000000 16.93 10.91 1.00 -34.88 19.57 0.28732

298K

\$cosmo\_energy

Total energy [a.u.] = -1721.6734122044

Total energy + OC corr. [a.u.] = -1721.6733109472

Total energy corrected [a.u.] = -1721.6733615758 Note: incorrect value contained for downward compatibility

Dielectric energy [a.u.] = -0.0022008052

Diel. energy + OC corr. [a.u.] = -0.0020995480

195K

\$cosmo\_energy

Total energy [a.u.] = -1721.6735775170

Total energy + OC corr. [a.u.] = -1721.6734671157

Total energy corrected [a.u.] = -1721.6735223164 Note: incorrect value contained for downward compatibility

Dielectric energy [a.u.] = -0.0024175825

Diel. energy + OC corr. [a.u.] = -0.0023071812

## PBr<sub>3</sub>

sy c3v

|     |         |         |         |
|-----|---------|---------|---------|
| p1  | 0.0000  | 0.0000  | -0.7575 |
| br2 | -0.9913 | 1.7169  | 0.2525  |
| br3 | -0.9913 | -1.7169 | 0.2525  |
| br4 | 1.9825  | 0.0000  | 0.2525  |

dist 1 p -- 2 br = 4.2046 au = 222.50 pm

dist 1 p -- 3 br = 4.2046 au = 222.50 pm

dist 1 p -- 4 br = 4.2046 au = 222.50 pm

bend 2 br -> 1 p <- 3 br = 101.00 deg

cycle = 7 MP2 energy = -8058.6887407425 |dE/dxyz| = 0.000006

zero point VIBRATIONAL energy : 0.0033016 Hartree

\$vibrational spectrum

| #  | mode | symmetry | wave number<br>cm**(-1) | IR intensity<br>km/mol | IR  | selection rules<br>RAMAN |
|----|------|----------|-------------------------|------------------------|-----|--------------------------|
| 1  |      |          | 0.00                    | 0.00000                | -   | -                        |
| 2  |      |          | 0.00                    | 0.00000                | -   | -                        |
| 3  |      |          | 0.00                    | 0.00000                | -   | -                        |
| 4  |      |          | 0.00                    | 0.00000                | -   | -                        |
| 5  |      |          | 0.00                    | 0.00000                | -   | -                        |
| 6  |      |          | 0.00                    | 0.00000                | -   | -                        |
| 7  | e    |          | 98.68                   | 0.00512                | YES | YES                      |
| 8  | e    |          | 98.68                   | 0.00512                | YES | YES                      |
| 9  | a1   |          | 145.34                  | 0.07167                | YES | YES                      |
| 10 | a1   |          | 368.03                  | 11.65804               | YES | YES                      |
| 11 | e    |          | 369.26                  | 104.78010              | YES | YES                      |
| 12 | e    |          | 369.26                  | 104.78010              | YES | YES                      |

| T<br>(K) | p<br>(MPa) | ln(qtrans) | ln(qrot) | ln(qvib) | chem.pot.<br>(kJ/mol) | energy<br>(kJ/mol) | entropy<br>(kJ/mol/K) |
|----------|------------|------------|----------|----------|-----------------------|--------------------|-----------------------|
|----------|------------|------------|----------|----------|-----------------------|--------------------|-----------------------|

298.15 0.1000000 19.00 12.97 3.18 -78.47 24.37 0.35325

| T<br>(K) | p<br>(MPa) | ln(qtrans) | ln(qrot) | ln(qvib) | chem.pot.<br>(kJ/mol) | energy<br>(kJ/mol) | entropy<br>(kJ/mol/K) |
|----------|------------|------------|----------|----------|-----------------------|--------------------|-----------------------|
|----------|------------|------------|----------|----------|-----------------------|--------------------|-----------------------|

195.15 0.1000000 17.95 12.33 1.94 -43.61 17.58 0.32188

298K

\$cosmo\_energy

Total energy [a.u.] = -8063.7610118500

Total energy + OC corr. [a.u.] = -8063.7609771901

Total energy corrected [a.u.] = -8063.7609945201 Note: incorrect value contained for downward compatibility

Dielectric energy [a.u.] = -0.0024254748

Diel. energy + OC corr. [a.u.] = -0.0023908149

195K

\$cosmo\_energy

Total energy [a.u.] = -8063.7611920134

Total energy + OC corr. [a.u.] = -8063.7611539653

Total energy corrected [a.u.] = -8063.7611729893 Note: incorrect value contained for downward compatibility

Dielectric energy [a.u.] = -0.0026459002

Diel. energy + OC corr. [a.u.] = -0.0026078521



### PI<sub>3</sub>

sy c3v

|    |         |         |         |
|----|---------|---------|---------|
| p1 | 0.0000  | 0.0000  | -0.9915 |
| i2 | -1.1020 | 1.9088  | 0.0807  |
| i3 | -1.1020 | -1.9088 | 0.0807  |
| i4 | 2.2041  | 0.0000  | 0.0807  |

dist 1 p -- 2 i = 4.6318 au = 245.10 pm  
dist 1 p -- 3 i = 4.6318 au = 245.10 pm  
dist 1 p -- 4 i = 4.6318 au = 245.10 pm  
bend 2 i -> 1 p <- 3 i = 102.30 deg

cycle = 6 MP2 energy = -374.9141282572 |dE/dxyz| = 0.000010

zero point VIBRATIONAL energy : 0.0025413 Hartree

\$vibrational spectrum

| #  | mode | symmetry | wave number<br>cm**(-1) | IR intensity<br>km/mol | IR  | selection rules<br>RAMAN |
|----|------|----------|-------------------------|------------------------|-----|--------------------------|
| 1  |      |          | 0.00                    | 0.00000                | -   | -                        |
| 2  |      |          | 0.00                    | 0.00000                | -   | -                        |
| 3  |      |          | 0.00                    | 0.00000                | -   | -                        |
| 4  |      |          | 0.00                    | 0.00000                | -   | -                        |
| 5  |      |          | 0.00                    | 0.00000                | -   | -                        |
| 6  |      |          | 0.00                    | 0.00000                | -   | -                        |
| 7  | e    |          | 66.89                   | 0.17340                | YES | YES                      |
| 8  | e    |          | 66.89                   | 0.17340                | YES | YES                      |
| 9  | a1   |          | 99.06                   | 0.01472                | YES | YES                      |
| 10 | a1   |          | 289.87                  | 2.68211                | YES | YES                      |
| 11 | e    |          | 296.40                  | 99.41176               | YES | YES                      |
| 12 | e    |          | 296.40                  | 99.41176               | YES | YES                      |

| T<br>(K) | p<br>(MPa) | ln(qtrans) | ln(qrot) | ln(qvib) | chem.pot.<br>(kJ/mol) | energy<br>(kJ/mol) | entropy<br>(kJ/mol/K) |
|----------|------------|------------|----------|----------|-----------------------|--------------------|-----------------------|
|----------|------------|------------|----------|----------|-----------------------|--------------------|-----------------------|

298.15 0.1000000 19.63 13.99 4.37 -87.53 23.61 0.38108

| T<br>(K) | p<br>(MPa) | ln(qtrans) | ln(qrot) | ln(qvib) | chem.pot.<br>(kJ/mol) | energy<br>(kJ/mol) | entropy<br>(kJ/mol/K) |
|----------|------------|------------|----------|----------|-----------------------|--------------------|-----------------------|
|----------|------------|------------|----------|----------|-----------------------|--------------------|-----------------------|

195.15 0.1000000 18.57 13.36 2.91 -49.86 16.51 0.34843

298K

\$cosmo\_energy

Total energy [a.u.] = -375.7293156875

Total energy + OC corr. [a.u.] = -375.7295303368

Total energy corrected [a.u.] = -375.7294230121 Note: incorrect value contained for downward compatibility

Dielectric energy [a.u.] = -0.0036214258

Diel. energy + OC corr. [a.u.] = -0.0038360751

195K

\$cosmo\_energy

Total energy [a.u.] = -375.7293156898

Total energy + OC corr. [a.u.] = -375.7295300330

Total energy corrected [a.u.] = -375.7294228614 Note: incorrect value contained for downward compatibility

Dielectric energy [a.u.] = -0.0036187456

Diel. energy + OC corr. [a.u.] = -0.0038330888

### AsI<sub>3</sub>

sy c3v

|     |         |         |         |
|-----|---------|---------|---------|
| as1 | 0.0000  | 0.0000  | -0.9591 |
| i2  | -1.1340 | 1.9642  | 0.1887  |
| i3  | -1.1340 | -1.9642 | 0.1887  |
| i4  | 2.2681  | 0.0000  | 0.1887  |

dist 1 as -- 2 i = 4.8036 au = 254.20 pm

dist 1 as -- 3 i = 4.8036 au = 254.20 pm

dist 1 as -- 4 i = 4.8036 au = 254.20 pm

bend 2 i -> 1 as <- 3 i = 101.20 deg

cycle = 7 MP2 energy = -2268.5092000100 |dE/dxyz| = 0.000001

zero point VIBRATIONAL energy : 0.0019050 Hartree

\$vibrational spectrum

| # mode # | symmetry | wave number<br>cm**(-1) | IR intensity<br>km/mol | selection rules<br>IR RAMAN |
|----------|----------|-------------------------|------------------------|-----------------------------|
| 1        |          | 0.00                    | 0.00000                | - -                         |
| 2        |          | 0.00                    | 0.00000                | - -                         |
| 3        |          | 0.00                    | 0.00000                | - -                         |
| 4        |          | 0.00                    | 0.00000                | - -                         |
| 5        |          | 0.00                    | 0.00000                | - -                         |
| 6        |          | 0.00                    | 0.00000                | - -                         |
| 7        | e        | 58.88                   | 0.01721                | YES YES                     |
| 8        | e        | 58.88                   | 0.01721                | YES YES                     |
| 9        | a1       | 83.53                   | 0.02325                | YES YES                     |
| 10       | a1       | 210.14                  | 2.18880                | YES YES                     |
| 11       | e        | 212.39                  | 51.00994               | YES YES                     |
| 12       | e        | 212.39                  | 51.00994               | YES YES                     |

| T (K) | p (MPa) | ln(qtrans) | ln(qrot) | ln(qvib) | chem.pot. (kJ/mol) | energy (kJ/mol) | entropy (kJ/mol/K) |
|-------|---------|------------|----------|----------|--------------------|-----------------|--------------------|
|-------|---------|------------|----------|----------|--------------------|-----------------|--------------------|

298.15 0.1000000 19.79 14.12 5.24 -92.03 23.01 0.39417

| T (K) | p (MPa) | ln(qtrans) | ln(qrot) | ln(qvib) | chem.pot. (kJ/mol) | energy (kJ/mol) | entropy (kJ/mol/K) |
|-------|---------|------------|----------|----------|--------------------|-----------------|--------------------|
|-------|---------|------------|----------|----------|--------------------|-----------------|--------------------|

195.15 0.1000000 18.73 13.49 3.57 -53.06 15.65 0.36041

298K

\$cosmo\_energy

Total energy [a.u.] = -2270.3646554434

Total energy + OC corr. [a.u.] = -2270.3648911812

Total energy corrected [a.u.] = -2270.3647733123 Note: incorrect value contained for downward compatibility

Dielectric energy [a.u.] = -0.0041725633

Diel. energy + OC corr. [a.u.] = -0.0044083011

195K

\$cosmo\_energy

Total energy [a.u.] = -2270.3649663147

Total energy + OC corr. [a.u.] = -2270.3652246382

Total energy corrected [a.u.] = -2270.3650954765 Note: incorrect value contained for downward compatibility

Dielectric energy [a.u.] = -0.0045819239

Diel. energy + OC corr. [a.u.] = -0.0048402474

### I<sub>3</sub>C-PCl<sub>3</sub><sup>+</sup>

sy c3v

|     |         |         |         |
|-----|---------|---------|---------|
| c1  | 0.0000  | 0.0000  | 0.9396  |
| p2  | 0.0000  | 0.0000  | -0.8806 |
| i3  | -1.0288 | -1.7819 | 1.5610  |
| i4  | -1.0288 | 1.7819  | 1.5610  |
| i5  | 2.0576  | 0.0000  | 1.5610  |
| cl6 | 0.9153  | 1.5853  | -1.5901 |
| cl7 | -1.8305 | 0.0000  | -1.5901 |
| cl8 | 0.9153  | -1.5853 | -1.5901 |

dist 1 c -- 2 p = 3.4397 au = 182.02 pm

dist 2 p -- 6 cl = 3.7099 au = 196.32 pm

dist 1 c -- 3 i = 4.0618 au = 214.94 pm

bend 1 c -> 2 p <- 6 cl = 111.18 deg

bend 3 i -> 1 c <- 4 i = 112.00 deg

bend 6 cl -> 2 p <- 7 cl = 107.71 deg

cycle = 20 MP2 energy = -1791.7784401788 |dE/dxyz| = 0.000002

zero point VIBRATIONAL energy : 0.0115859 Hartree

#### \$vibrational spectrum

| #  | mode | symmetry | wave number | IR intensity | selection rules |
|----|------|----------|-------------|--------------|-----------------|
| #  |      |          | cm**(-1)    | km/mol       | IR RAMAN        |
| 1  |      |          | 0.00        | 0.00000      | - -             |
| 2  |      |          | 0.00        | 0.00000      | - -             |
| 3  |      |          | 0.00        | 0.00000      | - -             |
| 4  |      |          | 0.00        | 0.00000      | - -             |
| 5  |      |          | 0.00        | 0.00000      | - -             |
| 6  |      |          | 0.00        | 0.00000      | - -             |
| 7  | a2   |          | 48.79       | 0.00000      | NO NO           |
| 8  | e    |          | 71.66       | 0.03289      | YES YES         |
| 9  | e    |          | 71.66       | 0.03289      | YES YES         |
| 10 | e    |          | 105.60      | 0.00026      | YES YES         |
| 11 | e    |          | 105.60      | 0.00026      | YES YES         |
| 12 | a1   |          | 115.28      | 0.66631      | YES YES         |
| 13 | e    |          | 142.21      | 0.74182      | YES YES         |
| 14 | e    |          | 142.21      | 0.74182      | YES YES         |
| 15 | a1   |          | 167.58      | 0.22773      | YES YES         |
| 16 | e    |          | 212.85      | 3.70759      | YES YES         |
| 17 | e    |          | 212.85      | 3.70759      | YES YES         |
| 18 | a1   |          | 283.99      | 20.82548     | YES YES         |
| 19 | a1   |          | 458.07      | 88.41716     | YES YES         |
| 20 | e    |          | 538.64      | 52.46870     | YES YES         |
| 21 | e    |          | 538.64      | 52.46870     | YES YES         |
| 22 | e    |          | 601.80      | 102.86169    | YES YES         |
| 23 | e    |          | 601.80      | 102.86169    | YES YES         |
| 24 | a1   |          | 666.39      | 53.83641     | YES YES         |

298K:

|     |       |            |          |          |           |          |            |
|-----|-------|------------|----------|----------|-----------|----------|------------|
| T   | p     | ln(qtrans) | ln(qrot) | ln(qvib) | chem.pot. | energy   | entropy    |
| (K) | (MPa) |            |          |          | (kJ/mol)  | (kJ/mol) | (kJ/mol/K) |

298.15 0.1000000 20.01 14.66 10.30 -81.07 61.79 0.48748

195K:

|     |       |            |          |          |           |          |            |
|-----|-------|------------|----------|----------|-----------|----------|------------|
| T   | p     | ln(qtrans) | ln(qrot) | ln(qvib) | chem.pot. | energy   | entropy    |
| (K) | (MPa) |            |          |          | (kJ/mol)  | (kJ/mol) | (kJ/mol/K) |

195.15 0.1000000 18.95 14.02 6.67 -33.92 47.42 0.42509

298K:

\$cosmo\_energy

Total energy [a.u.] = -1793.8598083151

Total energy + OC corr. [a.u.] = -1793.8576237540

Total energy corrected [a.u.] = -1793.8587160346 Note: incorrect value contained for downward compatibility

Dielectric energy [a.u.] = -0.0603598277

Diel. energy + OC corr. [a.u.] = -0.0581752666

195K:

\$cosmo\_energy

Total energy [a.u.] = -1793.8642586034

Total energy + OC corr. [a.u.] = -1793.8619143044

Total energy corrected [a.u.] = -1793.8630864539 Note: incorrect value contained for downward compatibility

Dielectric energy [a.u.] = -0.0648568845

Diel. energy + OC corr. [a.u.] = -0.0625125855

| atom | charge  |
|------|---------|
| 1 c  | -0.4766 |
| 2 p  | 1.1943  |
| 3 i  | 0.1664  |
| 4 i  | 0.1664  |
| 5 i  | 0.1664  |
| 6 cl | -0.0723 |
| 7 cl | -0.0723 |
| 8 cl | -0.0723 |

### I<sub>3</sub>C-PBr<sub>3</sub><sup>+</sup>

sy c3v

|     |         |         |         |
|-----|---------|---------|---------|
| c1  | 0.0000  | 0.0000  | 0.9670  |
| p2  | 0.0000  | 0.0000  | -0.8735 |
| i3  | -1.0270 | -1.7787 | 1.5982  |
| i4  | -1.0270 | 1.7787  | 1.5982  |
| i5  | 2.0539  | 0.0000  | 1.5982  |
| br6 | 1.0006  | 1.7331  | -1.6293 |
| br7 | -2.0012 | 0.0000  | -1.6293 |
| br8 | 1.0006  | -1.7331 | -1.6293 |

dist 1 c -- 2 p = 3.4780 au = 184.05 pm

dist 2 p -- 6 br = 4.0424 au = 213.91 pm

dist 1 c -- 3 i = 4.0605 au = 214.87 pm

bend 1 c -> 2 p <- 6 br = 110.69 deg

bend 2 p -> 1 c <- 3 i = 107.08 deg

bend 6 br -> 2 p <- 7 br = 108.22 deg

bend 3 i -> 1 c <- 4 i = 111.75 deg

cycle = 3 MP2 energy = -8130.4156727174 |dE/dxyz| = 0.000002

zero point VIBRATIONAL energy : 0.0096701 Hartree

#### \$vibrational spectrum

| #  | mode | symmetry | wave number<br>cm**(-1) | IR intensity<br>km/mol | selection rules<br>IR RAMAN |
|----|------|----------|-------------------------|------------------------|-----------------------------|
| 1  |      |          | 0.00                    | 0.00000                | - -                         |
| 2  |      |          | 0.00                    | 0.00000                | - -                         |
| 3  |      |          | 0.00                    | 0.00000                | - -                         |
| 4  |      |          | 0.00                    | 0.00000                | - -                         |
| 5  |      |          | 0.00                    | 0.00000                | - -                         |
| 6  |      |          | 0.00                    | 0.00000                | - -                         |
| 7  | a2   |          | 33.64                   | 0.00000                | NO NO                       |
| 8  | e    |          | 61.84                   | 0.01593                | YES YES                     |
| 9  | e    |          | 61.84                   | 0.01593                | YES YES                     |
| 10 | e    |          | 87.93                   | 0.03865                | YES YES                     |
| 11 | e    |          | 87.93                   | 0.03865                | YES YES                     |
| 12 | a1   |          | 89.81                   | 0.02978                | YES YES                     |
| 13 | e    |          | 107.11                  | 0.00064                | YES YES                     |
| 14 | e    |          | 107.11                  | 0.00064                | YES YES                     |
| 15 | e    |          | 141.58                  | 0.75662                | YES YES                     |
| 16 | e    |          | 141.58                  | 0.75662                | YES YES                     |
| 17 | a1   |          | 152.48                  | 0.81997                | YES YES                     |
| 18 | a1   |          | 195.98                  | 0.27371                | YES YES                     |
| 19 | a1   |          | 353.25                  | 87.24477               | YES YES                     |
| 20 | e    |          | 466.75                  | 109.44486              | YES YES                     |
| 21 | e    |          | 466.75                  | 109.44486              | YES YES                     |
| 22 | e    |          | 544.31                  | 22.40776               | YES YES                     |
| 23 | e    |          | 544.31                  | 22.40776               | YES YES                     |
| 24 | a1   |          | 600.50                  | 7.25610                | YES YES                     |

298K:

| T<br>(K) | p<br>(MPa) | ln(qtrans) | ln(qrot) | ln(qvib) | chem.pot.<br>(kJ/mol) | energy<br>(kJ/mol) | entropy<br>(kJ/mol/K) |
|----------|------------|------------|----------|----------|-----------------------|--------------------|-----------------------|
|----------|------------|------------|----------|----------|-----------------------|--------------------|-----------------------|

298.15 0.1000000 20.35 15.20 12.77 -94.40 59.42 0.52423

195K:

| T<br>(K) | p<br>(MPa) | ln(qtrans) | ln(qrot) | ln(qvib) | chem.pot.<br>(kJ/mol) | energy<br>(kJ/mol) | entropy<br>(kJ/mol/K) |
|----------|------------|------------|----------|----------|-----------------------|--------------------|-----------------------|
|----------|------------|------------|----------|----------|-----------------------|--------------------|-----------------------|

195.15 0.1000000 19.29 14.57 8.66 -43.60 44.30 0.45875

298K:

\$cosmo\_energy

Total energy [a.u.] = -8135.9433474625  
Total energy corrected [a.u.] = -8135.9419983816  
Dielectric energy [a.u.] = -0.0597767052  
Dielectric energy corr. [a.u.] = -0.0584276242

195K:

\$cosmo\_energy

Total energy [a.u.] = -8135.9520323391  
Total energy + OC corr. [a.u.] = -8135.9492765032  
Total energy corrected [a.u.] = -8135.9506544212 Note: incorrect value contained for downward compatibility  
Dielectric energy [a.u.] = -0.0636095088  
Diel. energy + OC corr. [a.u.] = -0.0608536729

| atom | charge  |
|------|---------|
| 1 c  | -0.4669 |
| 2 p  | 1.0650  |
| 3 i  | 0.1648  |
| 4 i  | 0.1648  |
| 5 i  | 0.1648  |
| 6 br | -0.0309 |
| 7 br | -0.0309 |
| 8 br | -0.0309 |

### I<sub>3</sub>C-PI<sub>3</sub><sup>+</sup>

sy c3v

|    |         |         |         |
|----|---------|---------|---------|
| c1 | 0.0000  | 0.0000  | 0.9949  |
| p2 | 0.0000  | 0.0000  | -0.8703 |
| i3 | -1.0244 | -1.7743 | 1.6426  |
| i4 | -1.0244 | 1.7743  | 1.6426  |
| i5 | 2.0488  | 0.0000  | 1.6426  |
| i6 | 1.1142  | 1.9299  | -1.6841 |
| i7 | -2.2284 | 0.0000  | -1.6841 |
| i8 | 1.1142  | -1.9299 | -1.6841 |

dist 1 c -- 2 p = 3.5247 au = 186.52 pm

dist 1 c -- 3 i = 4.0605 au = 214.87 pm

dist 2 p -- 6 i = 4.4832 au = 237.24 pm

bend 1 c -> 2 p <- 6 i = 110.06 deg

bend 2 p -> 1 c <- 3 i = 107.54 deg

bend 3 i -> 1 c <- 4 i = 111.33 deg

bend 6 i -> 2 p <- 7 i = 108.87 deg

cycle = 3 MP2 energy = -446.6542948480 |dE/dxyz| = 0.000010

zero point VIBRATIONAL energy : 0.0085201 Hartree

#### \$vibrational spectrum

| #  | mode | symmetry | wave number<br>cm**(-1) | IR intensity<br>km/mol | selection rules<br>IR RAMAN |
|----|------|----------|-------------------------|------------------------|-----------------------------|
| 1  |      |          | 0.00                    | 0.00000                | - -                         |
| 2  |      |          | 0.00                    | 0.00000                | - -                         |
| 3  |      |          | 0.00                    | 0.00000                | - -                         |
| 4  |      |          | 0.00                    | 0.00000                | - -                         |
| 5  |      |          | 0.00                    | 0.00000                | - -                         |
| 6  |      |          | 0.00                    | 0.00000                | - -                         |
| 7  | a2   |          | 29.94                   | 0.00000                | NO NO                       |
| 8  | e    |          | 50.68                   | 0.04521                | YES YES                     |
| 9  | e    |          | 50.68                   | 0.04521                | YES YES                     |
| 10 | e    |          | 71.49                   | 0.00004                | YES YES                     |
| 11 | e    |          | 71.49                   | 0.00004                | YES YES                     |
| 12 | a1   |          | 71.87                   | 0.00609                | YES YES                     |
| 13 | e    |          | 90.61                   | 0.02290                | YES YES                     |
| 14 | e    |          | 90.61                   | 0.02290                | YES YES                     |
| 15 | e    |          | 118.84                  | 0.06260                | YES YES                     |
| 16 | e    |          | 118.84                  | 0.06260                | YES YES                     |
| 17 | a1   |          | 127.11                  | 0.00009                | YES YES                     |
| 18 | a1   |          | 162.06                  | 1.09480                | YES YES                     |
| 19 | a1   |          | 302.45                  | 62.20298               | YES YES                     |
| 20 | e    |          | 378.32                  | 93.79270               | YES YES                     |
| 21 | e    |          | 378.32                  | 93.79270               | YES YES                     |
| 22 | a1   |          | 539.53                  | 1.74965                | YES YES                     |
| 23 | e    |          | 543.53                  | 19.91829               | YES YES                     |
| 24 | e    |          | 543.53                  | 19.91829               | YES YES                     |

298K:

| T (K) | p (MPa) | ln(qtrans) | ln(qrot) | ln(qvib) | chem.pot. (kJ/mol) | energy (kJ/mol) | entropy (kJ/mol/K) |
|-------|---------|------------|----------|----------|--------------------|-----------------|--------------------|
|-------|---------|------------|----------|----------|--------------------|-----------------|--------------------|

|        |           |       |       |       |         |       |         |
|--------|-----------|-------|-------|-------|---------|-------|---------|
| 298.15 | 0.1000000 | 20.64 | 15.68 | 14.72 | -104.15 | 58.13 | 0.55263 |
|--------|-----------|-------|-------|-------|---------|-------|---------|

| T (K) | p (MPa) | ln(qtrans) | ln(qrot) | ln(qvib) | chem.pot. (kJ/mol) | energy (kJ/mol) | entropy (kJ/mol/K) |
|-------|---------|------------|----------|----------|--------------------|-----------------|--------------------|
|-------|---------|------------|----------|----------|--------------------|-----------------|--------------------|

195.15 0.1000000 19.58 15.04 10.29 -50.51 42.58 0.48532

298K:

\$cosmo\_energy

Total energy [a.u.] = -447.9079835744

Total energy corrected [a.u.] = -447.9063569764

Dielectric energy [a.u.] = -0.0592767437

Dielectric energy corr. [a.u.] = -0.0576501456

195K:

\$cosmo\_energy

Total energy [a.u.] = -447.9194125902

Total energy + OC corr. [a.u.] = -447.9159857291

Total energy corrected [a.u.] = -447.9176991597 Note: incorrect value contained for downward compatibility

Dielectric energy [a.u.] = -0.0630273000

Diel. energy + OC corr. [a.u.] = -0.0596004388

| ----- |         |
|-------|---------|
| atom  | charge  |
| ----- |         |
| 1 c   | -0.4541 |
| 2 p   | 0.5906  |
| 3 i   | 0.1582  |
| 4 i   | 0.1582  |
| 5 i   | 0.1582  |
| 6 i   | 0.1296  |
| 7 i   | 0.1296  |
| 8 i   | 0.1296  |
| ----- |         |



**I<sub>3</sub>C-AsI<sub>3</sub><sup>+</sup>**

sy c3v

|     |         |         |         |
|-----|---------|---------|---------|
| c1  | 0.0000  | 0.0000  | 1.1721  |
| as2 | 0.0000  | 0.0000  | -0.8171 |
| i3  | -1.0274 | -1.7795 | 1.7771  |
| i4  | -1.0274 | 1.7795  | 1.7771  |
| i5  | 2.0548  | 0.0000  | 1.7771  |
| i6  | 1.1585  | 2.0066  | -1.6532 |
| i7  | -2.3170 | 0.0000  | -1.6532 |
| i8  | 1.1585  | -2.0066 | -1.6532 |

dist 1 c -- 2 as = 3.7591 au = 198.92 pm

dist 1 c -- 3 i = 4.0479 au = 214.20 pm

dist 2 as -- 6 i = 4.6549 au = 246.33 pm

bend 1 c -> 2 as <- 6 i = 109.84 deg

bend 2 as -> 1 c <- 3 i = 106.41 deg

bend 3 i -> 1 c <- 4 i = 112.36 deg

bend 6 i -> 2 as <- 7 i = 109.10 deg

cycle = 7 SCF+MP2 energy = -2340.2318712799 |dE/dxyz| = 0.000165

zero point VIBRATIONAL energy : 0.0073397 Hartree

\$vibrational spectrum

| #  | mode | symmetry | wave number | IR intensity | selection rules |
|----|------|----------|-------------|--------------|-----------------|
| #  |      | cm**(-1) | km/mol      | IR           | RAMAN           |
| 1  |      | 0.00     | 0.00000     | -            | -               |
| 2  |      | 0.00     | 0.00000     | -            | -               |
| 3  |      | 0.00     | 0.00000     | -            | -               |
| 4  |      | 0.00     | 0.00000     | -            | -               |
| 5  |      | 0.00     | 0.00000     | -            | -               |
| 6  |      | 0.00     | 0.00000     | -            | -               |
| 7  | a2   | 22.69    | 0.00000     | NO           | NO              |
| 8  | e    | 42.53    | 0.04181     | YES          | YES             |
| 9  | e    | 42.53    | 0.04181     | YES          | YES             |
| 10 | a1   | 59.43    | 0.17425     | YES          | YES             |
| 11 | e    | 61.67    | 0.00745     | YES          | YES             |
| 12 | e    | 61.67    | 0.00745     | YES          | YES             |
| 13 | e    | 80.52    | 0.02472     | YES          | YES             |
| 14 | e    | 80.52    | 0.02472     | YES          | YES             |
| 15 | a1   | 112.52   | 0.03812     | YES          | YES             |
| 16 | e    | 115.59   | 0.05227     | YES          | YES             |
| 17 | e    | 115.59   | 0.05227     | YES          | YES             |
| 18 | a1   | 161.75   | 3.44931     | YES          | YES             |
| 19 | a1   | 213.98   | 26.71502    | YES          | YES             |
| 20 | e    | 256.24   | 37.27007    | YES          | YES             |
| 21 | e    | 256.24   | 37.27007    | YES          | YES             |
| 22 | a1   | 429.81   | 63.17628    | YES          | YES             |
| 23 | e    | 554.23   | 40.22124    | YES          | YES             |
| 24 | e    | 554.23   | 40.22124    | YES          | YES             |

298K:

|     |       |            |          |          |           |          |            |
|-----|-------|------------|----------|----------|-----------|----------|------------|
| T   | p     | ln(qtrans) | ln(qrot) | ln(qvib) | chem.pot. | energy   | entropy    |
| (K) | (MPa) |            |          |          | (kJ/mol)  | (kJ/mol) | (kJ/mol/K) |

298.15 0.1000000 20.72 15.78 16.59 -112.32 56.82 0.57563

195K:

|     |       |            |          |          |           |          |            |
|-----|-------|------------|----------|----------|-----------|----------|------------|
| T   | p     | ln(qtrans) | ln(qrot) | ln(qvib) | chem.pot. | energy   | entropy    |
| (K) | (MPa) |            |          |          | (kJ/mol)  | (kJ/mol) | (kJ/mol/K) |

195.15 0.1000000 19.66 15.14 11.84 -56.40 40.77 0.50625

298K:

\$cosmo\_energy

Total energy [a.u.] = -2342.5256950902

Total energy corrected [a.u.] = -2342.5240603963

Dielectric energy [a.u.] = -0.0582171525

Dielectric energy corr. [a.u.] = -0.0565824586

195K:

\$cosmo\_energy

Total energy [a.u.] = -2342.5338124381

Total energy + OC corr. [a.u.] = -2342.5305976665

Total energy corrected [a.u.] = -2342.5322050523 Note: incorrect value contained for downward compatibility

Dielectric energy [a.u.] = -0.0574758635

Diel. energy + OC corr. [a.u.] = -0.0542610918

| atom | charge  |
|------|---------|
| 1 c  | -0.4271 |
| 2 as | 0.6265  |
| 3 i  | 0.1605  |
| 4 i  | 0.1605  |
| 5 i  | 0.1605  |
| 6 i  | 0.1064  |
| 7 i  | 0.1064  |
| 8 i  | 0.1064  |

### BI<sub>3</sub>

sy d3h

|    |         |         |        |
|----|---------|---------|--------|
| b1 | 0.0000  | 0.0000  | 0.0000 |
| i2 | 1.0569  | -1.8306 | 0.0000 |
| i3 | 1.0569  | 1.8306  | 0.0000 |
| i4 | -2.1138 | 0.0000  | 0.0000 |

dist 1 b -- 2 i = 3.9945 au = 211.38 pm

bend 2 i -> 1 b <- 3 i = 120.00 deg

cycle = 5 SCF+MP2 energy = -58.8312373446 |dE/dxyz| = 0.000002

zero point VIBRATIONAL energy : 0.0047376 Hartree

#### \$vibrational spectrum

| # mode | symmetry | wave number | IR intensity | selection rules |
|--------|----------|-------------|--------------|-----------------|
| #      |          | cm**(-1)    | km/mol       | IR RAMAN        |
| 1      |          | 0.00        | 0.00000      | - -             |
| 2      |          | 0.00        | 0.00000      | - -             |
| 3      |          | 0.00        | 0.00000      | - -             |
| 4      |          | 0.00        | 0.00000      | - -             |
| 5      |          | 0.00        | 0.00000      | - -             |
| 6      |          | 0.00        | 0.00000      | - -             |
| 7      | e'       | 98.95       | 0.00038      | YES YES         |
| 8      | e'       | 98.95       | 0.00038      | YES YES         |
| 9      | a1'      | 187.43      | 0.00000      | NO YES          |
| 10     | a2''     | 308.93      | 1.11979      | YES NO          |
| 11     | e'       | 692.66      | 256.25625    | YES YES         |
| 12     | e'       | 692.66      | 256.25625    | YES YES         |

| T   | p     | ln(qtrans) | ln(qrot) | ln(qvib) | chem.pot. | energy   | entropy    |
|-----|-------|------------|----------|----------|-----------|----------|------------|
| (K) | (MPa) |            |          |          | (kJ/mol)  | (kJ/mol) | (kJ/mol/K) |

298.15 0.1000000 19.56 13.07 2.78 -75.34 26.95 0.35138

#### \$cosmo\_energy

Total energy [a.u.] = -59.2793453947  
Total energy corrected [a.u.] = -59.2793945410  
Dielectric energy [a.u.] = -0.0024963906  
Dielectric energy corr. [a.u.] = -0.0025455369

### I<sub>3</sub>BPCl<sub>3</sub>

sy c3v

|     |         |         |         |
|-----|---------|---------|---------|
| b1  | 0.0000  | 0.0000  | 0.3003  |
| p2  | 0.0000  | 0.0000  | -1.6534 |
| i3  | -1.0697 | -1.8527 | 0.8174  |
| i4  | -1.0697 | 1.8527  | 0.8174  |
| i5  | 2.1393  | 0.0000  | 0.8174  |
| cl6 | 0.9109  | 1.5777  | -2.4748 |
| cl7 | -1.8218 | 0.0000  | -2.4748 |
| cl8 | 0.9109  | -1.5777 | -2.4748 |

dist 1 b -- 2 p = 3.6918 au = 195.36 pm

dist 2 p -- 6 cl = 3.7765 au = 199.84 pm

dist 1 b -- 3 i = 4.1591 au = 220.09 pm

bend 1 b -> 2 p <- 6 cl = 114.27 deg

bend 2 p -> 1 b <- 3 i = 103.59 deg

bend 3 i -> 1 b <- 4 i = 114.66 deg

bend 6 cl -> 2 p <- 7 cl = 104.27 deg

cycle = 8 MP2 energy = -1778.9176480474 |dE/dxyz| = 0.000015

zero point VIBRATIONAL energy : 0.0107921 Hartree

\$vibrational spectrum

| #  | mode | symmetry | wave number<br>cm**(-1) | IR intensity<br>km/mol | selection rules<br>IR RAMAN |
|----|------|----------|-------------------------|------------------------|-----------------------------|
| 1  |      |          | 0.00                    | 0.00000                | - -                         |
| 2  |      |          | 0.00                    | 0.00000                | - -                         |
| 3  |      |          | 0.00                    | 0.00000                | - -                         |
| 4  |      |          | 0.00                    | 0.00000                | - -                         |
| 5  |      |          | 0.00                    | 0.00000                | - -                         |
| 6  |      |          | 0.00                    | 0.00000                | - -                         |
| 7  | a2   |          | 41.08                   | 0.00000                | NO NO                       |
| 8  | e    |          | 58.00                   | 0.12243                | YES YES                     |
| 9  | e    |          | 58.00                   | 0.12243                | YES YES                     |
| 10 | e    |          | 92.67                   | 0.03921                | YES YES                     |
| 11 | e    |          | 92.67                   | 0.03921                | YES YES                     |
| 12 | a1   |          | 100.12                  | 0.11779                | YES YES                     |
| 13 | e    |          | 133.76                  | 0.17778                | YES YES                     |
| 14 | e    |          | 133.76                  | 0.17778                | YES YES                     |
| 15 | a1   |          | 160.33                  | 0.18558                | YES YES                     |
| 16 | e    |          | 200.36                  | 1.30377                | YES YES                     |
| 17 | e    |          | 200.36                  | 1.30377                | YES YES                     |
| 18 | a1   |          | 264.35                  | 15.35806               | YES YES                     |
| 19 | a1   |          | 407.09                  | 172.34937              | YES YES                     |
| 20 | e    |          | 534.76                  | 88.93047               | YES YES                     |
| 21 | e    |          | 534.76                  | 88.93047               | YES YES                     |
| 22 | e    |          | 572.81                  | 146.94089              | YES YES                     |
| 23 | e    |          | 572.81                  | 146.94089              | YES YES                     |
| 24 | a1   |          | 579.46                  | 37.37920               | YES YES                     |

|     |       |            |          |          |           |          |            |
|-----|-------|------------|----------|----------|-----------|----------|------------|
| T   | p     | ln(qtrans) | ln(qrot) | ln(qvib) | chem.pot. | energy   | entropy    |
| (K) | (MPa) |            |          |          | (kJ/mol)  | (kJ/mol) | (kJ/mol/K) |

298.15 0.1000000 20.01 14.76 11.43 -86.17 60.72 0.50099

\$cosmo\_energy

Total energy [a.u.] = -1780.9594433020

Total energy + OC corr. [a.u.] = -1780.9600497508

Total energy corrected [a.u.] = -1780.9597465264 Note: incorrect value contained for downward compatibility

Dielectric energy [a.u.] = -0.0042401572

Diel. energy + OC corr. [a.u.] = -0.0048466060

| atom | charge  |
|------|---------|
| 1 b  | -0.7539 |
| 2 p  | 1.2176  |
| 3 i  | -0.0173 |
| 4 i  | -0.0173 |
| 5 i  | -0.0173 |
| 6 cl | -0.1373 |
| 7 cl | -0.1373 |
| 8 cl | -0.1373 |

### I<sub>3</sub>BPBr<sub>3</sub>

sy c3v

|     |         |         |         |
|-----|---------|---------|---------|
| b1  | 0.0000  | 0.0000  | 0.8282  |
| p2  | 0.0000  | 0.0000  | -1.1452 |
| i3  | -1.0688 | -1.8512 | 1.3431  |
| i4  | -1.0688 | 1.8512  | 1.3431  |
| i5  | 2.1376  | 0.0000  | 1.3431  |
| br6 | 0.9953  | 1.7240  | -2.0224 |
| br7 | -1.9907 | 0.0000  | -2.0224 |
| br8 | 0.9953  | -1.7240 | -2.0224 |

dist 1 b -- 2 p = 3.7292 au = 197.34 pm

dist 2 p -- 6 br = 4.1108 au = 217.53 pm

dist 1 b -- 3 i = 4.1550 au = 219.87 pm

bend 1 b -> 2 p <- 6 br = 113.78 deg

bend 2 p -> 1 b <- 3 i = 103.54 deg

bend 6 br -> 2 p <- 7 br = 104.84 deg

bend 3 i -> 1 b <- 4 i = 114.69 deg

cycle = 8 MP2 energy = -8117.5516427889 |dE/dxyz| = 0.000003

zero point VIBRATIONAL energy : 0.0090401 Hartree

\$vibrational spectrum

| #  | mode | symmetry | wave number | IR intensity | selection rules |
|----|------|----------|-------------|--------------|-----------------|
| #  |      |          | cm**(-1)    | km/mol       | IR RAMAN        |
| 1  |      |          | 0.00        | 0.00000      | - -             |
| 2  |      |          | 0.00        | 0.00000      | - -             |
| 3  |      |          | 0.00        | 0.00000      | - -             |
| 4  |      |          | 0.00        | 0.00000      | - -             |
| 5  |      |          | 0.00        | 0.00000      | - -             |
| 6  |      |          | 0.00        | 0.00000      | - -             |
| 7  | a2   |          | 28.29       | 0.00000      | NO NO           |
| 8  | e    |          | 50.33       | 0.06098      | YES YES         |
| 9  | e    |          | 50.33       | 0.06098      | YES YES         |
| 10 | a1   |          | 76.80       | 0.00994      | YES YES         |
| 11 | e    |          | 79.74       | 0.00413      | YES YES         |
| 12 | e    |          | 79.74       | 0.00413      | YES YES         |
| 13 | e    |          | 98.30       | 0.07177      | YES YES         |
| 14 | e    |          | 98.30       | 0.07177      | YES YES         |
| 15 | e    |          | 131.54      | 0.11328      | YES YES         |
| 16 | e    |          | 131.54      | 0.11328      | YES YES         |
| 17 | a1   |          | 148.35      | 0.22944      | YES YES         |
| 18 | a1   |          | 176.28      | 0.12209      | YES YES         |
| 19 | a1   |          | 331.06      | 163.52719    | YES YES         |
| 20 | e    |          | 415.15      | 100.15069    | YES YES         |
| 21 | e    |          | 415.15      | 100.15069    | YES YES         |
| 22 | a1   |          | 505.11      | 0.06538      | YES YES         |
| 23 | e    |          | 576.06      | 96.49117     | YES YES         |
| 24 | e    |          | 576.06      | 96.49117     | YES YES         |

|     |       |            |          |          |           |          |            |
|-----|-------|------------|----------|----------|-----------|----------|------------|
| T   | p     | ln(qtrans) | ln(qrot) | ln(qvib) | chem.pot. | energy   | entropy    |
| (K) | (MPa) |            |          |          | (kJ/mol)  | (kJ/mol) | (kJ/mol/K) |

298.15 0.1000000 20.35 15.29 14.00 -99.32 58.71 0.53838

\$cosmo\_energy

Total energy [a.u.] = -8123.0454167166

Total energy + OC corr. [a.u.] = -8123.0458996757

Total energy corrected [a.u.] = -8123.0456581961 Note: incorrect value contained for downward compatibility

Dielectric energy [a.u.] = -0.0048890949

Diel. energy + OC corr. [a.u.] = -0.0053720540

| atom | charge  |
|------|---------|
| 1 b  | -0.7390 |
| 2 p  | 1.0731  |
| 3 i  | -0.0130 |
| 4 i  | -0.0130 |
| 5 i  | -0.0130 |
| 6 br | -0.0984 |
| 7 br | -0.0984 |
| 8 br | -0.0984 |

### I<sub>3</sub>BPI<sub>3</sub>

sy c3v

|    |         |         |         |
|----|---------|---------|---------|
| b1 | 0.0000  | 0.0000  | 1.2175  |
| p2 | 0.0000  | 0.0000  | -0.7740 |
| i3 | -1.0674 | -1.8488 | 1.7406  |
| i4 | -1.0674 | 1.8488  | 1.7406  |
| i5 | 2.1348  | 0.0000  | 1.7406  |
| i6 | 1.1078  | 1.9188  | -1.7122 |
| i7 | -2.2157 | 0.0000  | -1.7122 |
| i8 | 1.1078  | -1.9188 | -1.7122 |

dist 1 b-- 2 p = 3.7634 au = 199.15 pm

dist 1 b-- 3 i = 4.1535 au = 219.79 pm

dist 2 p-- 6 i = 4.5469 au = 240.61 pm

bend 1 b-> 2 p <- 6 i = 112.95 deg

bend 2 p-> 1 b <- 3 i = 103.77 deg

bend 3 i-> 1 b <- 4 i = 114.52 deg

bend 6 i-> 2 p <- 7 i = 105.78 deg

cycle = 9 MP2 energy = -433.7843741267 |dE/dxyz| = 0.000005

zero point VIBRATIONAL energy : 0.0080010 Hartree

\$vibrational spectrum

| #  | mode | symmetry | wave number | IR intensity | selection rules |
|----|------|----------|-------------|--------------|-----------------|
| #  |      | cm**(-1) | km/mol      | IR           | RAMAN           |
| 1  |      | 0.00     | 0.00000     | -            | -               |
| 2  |      | 0.00     | 0.00000     | -            | -               |
| 3  |      | 0.00     | 0.00000     | -            | -               |
| 4  |      | 0.00     | 0.00000     | -            | -               |
| 5  |      | 0.00     | 0.00000     | -            | -               |
| 6  |      | 0.00     | 0.00000     | -            | -               |
| 7  | a2   | 25.54    | 0.00000     | NO           | NO              |
| 8  | e    | 43.40    | 0.02210     | YES          | YES             |
| 9  | e    | 43.40    | 0.02210     | YES          | YES             |
| 10 | a1   | 62.14    | 0.03526     | YES          | YES             |
| 11 | e    | 63.07    | 0.09024     | YES          | YES             |
| 12 | e    | 63.07    | 0.09024     | YES          | YES             |
| 13 | e    | 82.96    | 0.05467     | YES          | YES             |
| 14 | e    | 82.96    | 0.05467     | YES          | YES             |
| 15 | e    | 108.06   | 0.01497     | YES          | YES             |
| 16 | e    | 108.06   | 0.01497     | YES          | YES             |
| 17 | a1   | 114.70   | 0.49978     | YES          | YES             |
| 18 | a1   | 157.78   | 1.76223     | YES          | YES             |
| 19 | a1   | 284.88   | 121.80810   | YES          | YES             |
| 20 | e    | 334.32   | 97.69886    | YES          | YES             |
| 21 | e    | 334.32   | 97.69886    | YES          | YES             |
| 22 | a1   | 444.40   | 26.02664    | YES          | YES             |
| 23 | e    | 579.49   | 71.31014    | YES          | YES             |
| 24 | e    | 579.49   | 71.31014    | YES          | YES             |

| T   | p     | ln(qtrans) | ln(qrot) | ln(qvib) | chem.pot. | energy   | entropy    |
|-----|-------|------------|----------|----------|-----------|----------|------------|
| (K) | (MPa) |            |          |          | (kJ/mol)  | (kJ/mol) | (kJ/mol/K) |

298.15 0.1000000 20.64 15.76 16.00 -108.88 57.66 0.56691

\$cosmo\_energy

Total energy [a.u.] = -435.0116723502

Total energy + OC corr. [a.u.] = -435.0120173019



Total energy corrected [a.u.] = -435.0118448261 Note: incorrect value contained for downward compatibility

Dielectric energy [a.u.] = -0.0061444311

Diel. energy + OC corr. [a.u.] = -0.0064893827

| ----- |         |
|-------|---------|
| atom  | charge  |
| ----- |         |
| 1 b   | -0.7228 |
| 2 p   | 0.6141  |
| 3 i   | -0.0117 |
| 4 i   | -0.0117 |
| 5 i   | -0.0117 |
| 6 i   | 0.0479  |
| 7 i   | 0.0479  |
| 8 i   | 0.0479  |
| ----- |         |

### Cl<sub>3</sub><sup>·</sup>

sy c1

```
c1    0.0000    0.0000   -0.2646
i2    1.9875   -0.5051   -0.0074
i3   -0.5563    1.9738   -0.0077
i4   -1.4310   -1.4687   -0.0077
```

```
dist 1 c -- 2 i = 3.9055 au = 206.67 pm
dist 1 c -- 3 i = 3.9055 au = 206.67 pm
dist 1 c -- 4 i = 3.9055 au = 206.67 pm
bend 2 i -> 1 c <- 3 i = 118.48 deg
bend 2 i -> 1 c <- 4 i = 118.47 deg
bend 3 i -> 1 c <- 4 i = 118.48 deg
```

cycle = 9 MP2 energy = -71.9206658591 |dE/dxyz| = 0.000078

zero point VIBRATIONAL energy : 0.0041902 Hartree

#### \$vibrational spectrum

| #  | mode | symmetry | wave number<br>cm**(-1) | IR intensity<br>km/mol | IR  | selection rules<br>RAMAN |
|----|------|----------|-------------------------|------------------------|-----|--------------------------|
| 1  |      |          | 0.00                    | 0.00000                | -   | -                        |
| 2  |      |          | 0.00                    | 0.00000                | -   | -                        |
| 3  |      |          | 0.00                    | 0.00000                | -   | -                        |
| 4  |      |          | 0.00                    | 0.00000                | -   | -                        |
| 5  |      |          | 0.00                    | 0.00000                | -   | -                        |
| 6  |      |          | 0.00                    | 0.00000                | -   | -                        |
| 7  | a    |          | 102.31                  | 0.10298                | YES | YES                      |
| 8  | a    |          | 102.50                  | 0.10406                | YES | YES                      |
| 9  | a    |          | 170.49                  | 0.86917                | YES | YES                      |
| 10 | a    |          | 226.61                  | 5.88621                | YES | YES                      |
| 11 | a    |          | 618.36                  | 138.38603              | YES | YES                      |
| 12 | a    |          | 619.03                  | 138.43633              | YES | YES                      |

| T<br>(K) | p<br>(MPa) | ln(qtrans) | ln(qrot) | ln(qvib) | chem.pot.<br>(kJ/mol) | energy<br>(kJ/mol) | entropy<br>(kJ/mol/K) |
|----------|------------|------------|----------|----------|-----------------------|--------------------|-----------------------|
|----------|------------|------------|----------|----------|-----------------------|--------------------|-----------------------|

298.15 0.1000000 19.56 14.79 2.97 -81.53 26.02 0.36903

#### \$cosmo\_energy

Total energy [a.u.] = -72.3814232843

Total energy + OC corr. [a.u.] = -72.3816676544

Total energy corrected [a.u.] = -72.3815454694 Note: incorrect value contained for downward compatibility

Dielectric energy [a.u.] = -0.0031763655

Diel. energy + OC corr. [a.u.] = -0.0034207356

### PCl<sub>3</sub><sup>+</sup>

sy c1

|     |         |         |         |
|-----|---------|---------|---------|
| p1  | 0.0000  | -0.0000 | -0.4443 |
| cl2 | 0.4319  | -1.8131 | 0.1294  |
| cl3 | 1.3542  | 1.2806  | 0.1294  |
| cl4 | -1.7861 | 0.5325  | 0.1294  |

dist 1 p -- 2 cl = 3.6852 au = 195.01 pm

dist 1 p -- 3 cl = 3.6852 au = 195.01 pm

dist 1 p -- 4 cl = 3.6852 au = 195.01 pm

bend 2 cl -> 1 p <- 3 cl = 111.73 deg

bend 3 cl -> 1 p <- 4 cl = 111.72 deg

bend 2 cl -> 1 p <- 4 cl = 111.73 deg

cycle = 8 MP2 energy = -1719.7018556977 |dE/dxyz| = 0.000004

zero point VIBRATIONAL energy : 0.0051169 Hartree

#### \$vibrational spectrum

| #  | mode | symmetry | wave number<br>cm**(-1) | IR intensity<br>km/mol | IR  | selection rules<br>RAMAN |
|----|------|----------|-------------------------|------------------------|-----|--------------------------|
| 1  |      |          | 0.00                    | 0.00000                | -   | -                        |
| 2  |      |          | 0.00                    | 0.00000                | -   | -                        |
| 3  |      |          | 0.00                    | 0.00000                | -   | -                        |
| 4  |      |          | 0.00                    | 0.00000                | -   | -                        |
| 5  |      |          | 0.00                    | 0.00000                | -   | -                        |
| 6  |      |          | 0.00                    | 0.00000                | -   | -                        |
| 7  | a    |          | 175.25                  | 1.50293                | YES | YES                      |
| 8  | a    |          | 175.47                  | 1.51223                | YES | YES                      |
| 9  | a    |          | 244.60                  | 3.55011                | YES | YES                      |
| 10 | a    |          | 455.26                  | 5.48497                | YES | YES                      |
| 11 | a    |          | 597.54                  | 113.80743              | YES | YES                      |
| 12 | a    |          | 597.93                  | 113.84365              | YES | YES                      |

| T<br>(K) | p<br>(MPa) | ln(qtrans) | ln(qrot) | ln(qvib) | chem.pot.<br>(kJ/mol) | energy<br>(kJ/mol) | entropy<br>(kJ/mol/K) |
|----------|------------|------------|----------|----------|-----------------------|--------------------|-----------------------|
|----------|------------|------------|----------|----------|-----------------------|--------------------|-----------------------|

298.15 0.1000000 17.99 12.63 1.72 -66.74 26.85 0.32221

#### \$cosmo\_energy

Total energy [a.u.] = -1721.3929944429

Total energy + OC corr. [a.u.] = -1721.3917110851

Total energy corrected [a.u.] = -1721.3923527640 Note: incorrect value contained for downward compatibility

Dielectric energy [a.u.] = -0.0793985897

Diel. energy + OC corr. [a.u.] = -0.0781152318

### PBr<sub>3</sub><sup>+</sup>

sy c1

|     |         |         |         |
|-----|---------|---------|---------|
| p1  | 0.0000  | 0.0000  | -0.5309 |
| br2 | -0.7521 | -1.8927 | 0.0686  |
| br3 | 2.0152  | 0.2950  | 0.0686  |
| br4 | -1.2631 | 1.5977  | 0.0686  |

dist 1 p -- 2 br = 4.0120 au = 212.31 pm

dist 1 p -- 3 br = 4.0120 au = 212.31 pm

dist 1 p -- 4 br = 4.0120 au = 212.31 pm

bend 2 br -> 1 p <- 3 br = 112.36 deg

bend 2 br -> 1 p <- 4 br = 112.36 deg

bend 3 br -> 1 p <- 4 br = 112.36 deg

cycle = 8 MP2 energy = -8058.3477228822 |dE/dxyz| = 0.000003

zero point VIBRATIONAL energy : 0.0036372 Hartree

#### \$vibrational spectrum

| #  | mode | symmetry | wave number<br>cm**(-1) | IR intensity<br>km/mol | IR  | selection rules<br>RAMAN |
|----|------|----------|-------------------------|------------------------|-----|--------------------------|
| 1  |      |          | 0.00                    | 0.00000                | -   | -                        |
| 2  |      |          | 0.00                    | 0.00000                | -   | -                        |
| 3  |      |          | 0.00                    | 0.00000                | -   | -                        |
| 4  |      |          | 0.00                    | 0.00000                | -   | -                        |
| 5  |      |          | 0.00                    | 0.00000                | -   | -                        |
| 6  |      |          | 0.00                    | 0.00000                | -   | -                        |
| 7  | a    |          | 104.46                  | 0.31491                | YES | YES                      |
| 8  | a    |          | 105.45                  | 0.27268                | YES | YES                      |
| 9  | a    |          | 163.81                  | 0.44946                | YES | YES                      |
| 10 | a    |          | 308.41                  | 2.42707                | YES | YES                      |
| 11 | a    |          | 457.06                  | 87.47550               | YES | YES                      |
| 12 | a    |          | 457.36                  | 87.52518               | YES | YES                      |

| T<br>(K) | p<br>(MPa) | ln(qtrans) | ln(qrot) | ln(qvib) | chem.pot.<br>(kJ/mol) | energy<br>(kJ/mol) | entropy<br>(kJ/mol/K) |
|----------|------------|------------|----------|----------|-----------------------|--------------------|-----------------------|
|----------|------------|------------|----------|----------|-----------------------|--------------------|-----------------------|

298.15 0.1000000 19.00 14.09 2.94 -79.79 24.85 0.35927

#### \$cosmo\_energy

Total energy [a.u.] = -8063.4907481176

Total energy + OC corr. [a.u.] = -8063.4886138141

Total energy corrected [a.u.] = -8063.4896809658 Note: incorrect value contained for downward compatibility

Dielectric energy [a.u.] = -0.0739528642

Diel. energy + OC corr. [a.u.] = -0.0718185606

### PI<sub>3</sub><sup>+</sup>

sy c1

|    |         |         |         |
|----|---------|---------|---------|
| p1 | 0.0000  | 0.0000  | -0.5704 |
| i2 | -0.7238 | -2.1478 | 0.0464  |
| i3 | 2.2219  | 0.4471  | 0.0464  |
| i4 | -1.4982 | 1.7007  | 0.0464  |

dist 1 p -- 2 i = 4.4387 au = 234.89 pm

dist 1 p -- 3 i = 4.4387 au = 234.89 pm

dist 1 p -- 4 i = 4.4387 au = 234.89 pm

bend 2 i -> 1 p <- 3 i = 113.36 deg

bend 2 i -> 1 p <- 4 i = 113.36 deg

bend 3 i -> 1 p <- 4 i = 113.36 deg

cycle = 8 MP2 energy = -374.5965978030 |dE/dxyz| = 0.000004

zero point VIBRATIONAL energy : 0.0027371 Hartree

#### \$vibrational spectrum

| # mode # | symmetry | wave number<br>cm**(-1) | IR intensity<br>km/mol | IR  | selection rules<br>RAMAN |
|----------|----------|-------------------------|------------------------|-----|--------------------------|
| 1        |          | 0.00                    | 0.00000                | -   | -                        |
| 2        |          | 0.00                    | 0.00000                | -   | -                        |
| 3        |          | 0.00                    | 0.00000                | -   | -                        |
| 4        |          | 0.00                    | 0.00000                | -   | -                        |
| 5        |          | 0.00                    | 0.00000                | -   | -                        |
| 6        |          | 0.00                    | 0.00000                | -   | -                        |
| 7        | a        | 70.36                   | 0.01748                | YES | YES                      |
| 8        | a        | 70.59                   | 0.01719                | YES | YES                      |
| 9        | a        | 113.75                  | 0.00101                | YES | YES                      |
| 10       | a        | 230.45                  | 0.25350                | YES | YES                      |
| 11       | a        | 358.00                  | 64.21102               | YES | YES                      |
| 12       | a        | 358.29                  | 64.27085               | YES | YES                      |

| T (K) | p (MPa) | ln(qtrans) | ln(qrot) | ln(qvib) | chem.pot. (kJ/mol) | energy (kJ/mol) | entropy (kJ/mol/K) |
|-------|---------|------------|----------|----------|--------------------|-----------------|--------------------|
|-------|---------|------------|----------|----------|--------------------|-----------------|--------------------|

298.15 0.1000000 19.63 15.13 4.14 -89.25 23.85 0.38764

#### \$cosmo\_energy

Total energy [a.u.] = -375.4722286239

Total energy + OC corr. [a.u.] = -375.4690406557

Total energy corrected [a.u.] = -375.4706346398 Note: incorrect value contained for downward compatibility

Dielectric energy [a.u.] = -0.0693450001

Diel. energy + OC corr. [a.u.] = -0.0661570319

### AsI<sub>3</sub><sup>+</sup>

sy c1

```
as1    0.0000   -0.0000   -0.6053
i2     2.0950   -1.0438    0.1191
i3    -0.1436    2.3362    0.1191
i4    -1.9514   -1.2924    0.1191
```

dist 1 as -- 2 i = 4.6301 au = 245.01 pm

dist 1 as -- 3 i = 4.6301 au = 245.01 pm

dist 1 as -- 4 i = 4.6301 au = 245.01 pm

bend 2 i -> 1 as <- 3 i = 111.65 deg

bend 2 i -> 1 as <- 4 i = 111.65 deg

bend 3 i -> 1 as <- 4 i = 111.65 deg

cycle = 9 MP2 energy = -2268.1827123029 |dE/dxyz| = 0.000002

zero point VIBRATIONAL energy : 0.0019479 Hartree

#### \$vibrational spectrum

| #  | mode | symmetry | wave number<br>cm**(-1) | IR intensity<br>km/mol | IR  | selection rules<br>RAMAN |
|----|------|----------|-------------------------|------------------------|-----|--------------------------|
| 1  |      |          | 0.00                    | 0.00000                | -   | -                        |
| 2  |      |          | 0.00                    | 0.00000                | -   | -                        |
| 3  |      |          | 0.00                    | 0.00000                | -   | -                        |
| 4  |      |          | 0.00                    | 0.00000                | -   | -                        |
| 5  |      |          | 0.00                    | 0.00000                | -   | -                        |
| 6  |      |          | 0.00                    | 0.00000                | -   | -                        |
| 7  | a    |          | 60.57                   | 0.05147                | YES | YES                      |
| 8  | a    |          | 60.99                   | 0.04689                | YES | YES                      |
| 9  | a    |          | 84.89                   | 0.01220                | YES | YES                      |
| 10 | a    |          | 177.81                  | 0.34388                | YES | YES                      |
| 11 | a    |          | 235.10                  | 18.40278               | YES | YES                      |
| 12 | a    |          | 235.67                  | 18.45313               | YES | YES                      |

| T<br>(K) | p<br>(MPa) | ln(qtrans) | ln(qrot) | ln(qvib) | chem.pot.<br>(kJ/mol) | energy<br>(kJ/mol) | entropy<br>(kJ/mol/K) |
|----------|------------|------------|----------|----------|-----------------------|--------------------|-----------------------|
|----------|------------|------------|----------|----------|-----------------------|--------------------|-----------------------|

298.15 0.1000000 19.79 15.25 5.16 -94.52 23.05 0.40264

#### \$cosmo\_energy

Total energy [a.u.] = -2270.1015226309

Total energy + OC corr. [a.u.] = -2270.0982997399

Total energy corrected [a.u.] = -2270.0999111854 Note: incorrect value contained for downward compatibility

Dielectric energy [a.u.] = -0.0694817267

Diel. energy + OC corr. [a.u.] = -0.0662588357

## PCl<sub>3</sub>I<sup>+</sup>

sy c3v

|     |         |         |         |
|-----|---------|---------|---------|
| p1  | 0.0000  | 0.0000  | 0.0503  |
| cl2 | -0.9162 | 1.5869  | 0.7526  |
| cl3 | -0.9162 | -1.5869 | 0.7526  |
| cl4 | 1.8324  | 0.0000  | 0.7526  |
| i5  | 0.0000  | 0.0000  | -2.2838 |

dist 1 p -- 2 cl = 3.7083 au = 196.23 pm

dist 1 p -- 5 i = 4.4108 au = 233.41 pm

bend 2 cl -> 1 p <- 3 cl = 107.93 deg

bend 2 cl -> 1 p <- 5 i = 110.97 deg

cycle = 8 MP2 energy = -1731.1076791100 |dE/dxyz| = 0.000001

zero point VIBRATIONAL energy : 0.0065817 Hartree

### \$vibrational spectrum

| #  | mode | symmetry | wave number<br>cm**(-1) | IR intensity<br>km/mol | IR  | selection rules<br>RAMAN |
|----|------|----------|-------------------------|------------------------|-----|--------------------------|
| 1  |      |          | 0.00                    | 0.00000                | -   | -                        |
| 2  |      |          | 0.00                    | 0.00000                | -   | -                        |
| 3  |      |          | 0.00                    | 0.00000                | -   | -                        |
| 4  |      |          | 0.00                    | 0.00000                | -   | -                        |
| 5  |      |          | 0.00                    | 0.00000                | -   | -                        |
| 6  |      |          | 0.00                    | 0.00000                | -   | -                        |
| 7  | e    |          | 122.88                  | 0.21194                | YES | YES                      |
| 8  | e    |          | 122.88                  | 0.21194                | YES | YES                      |
| 9  | a1   |          | 170.30                  | 0.28119                | YES | YES                      |
| 10 | e    |          | 203.49                  | 2.52720                | YES | YES                      |
| 11 | e    |          | 203.49                  | 2.52720                | YES | YES                      |
| 12 | a1   |          | 327.70                  | 19.34716               | YES | YES                      |
| 13 | a1   |          | 528.92                  | 152.51735              | YES | YES                      |
| 14 | e    |          | 604.67                  | 122.07043              | YES | YES                      |
| 15 | e    |          | 604.67                  | 122.07043              | YES | YES                      |

| T<br>(K) | p<br>(MPa) | ln(qtrans) | ln(qrot) | ln(qvib) | chem.pot.<br>(kJ/mol) | energy<br>(kJ/mol) | entropy<br>(kJ/mol/K) |
|----------|------------|------------|----------|----------|-----------------------|--------------------|-----------------------|
|----------|------------|------------|----------|----------|-----------------------|--------------------|-----------------------|

298.15 0.100000 18.97 12.86 3.55 -70.41 35.24 0.36266

### \$cosmo\_energy

Total energy [a.u.] = -1732.9031401040

Total energy + OC corr. [a.u.] = -1732.9015250501

Total energy corrected [a.u.] = -1732.9023325771 Note: incorrect value contained for downward compatibility

Dielectric energy [a.u.] = -0.0694019841

Diel. energy + OC corr. [a.u.] = -0.0677869302

## PBr<sub>3</sub>I<sup>+</sup>

sy c3v

|     |         |         |         |
|-----|---------|---------|---------|
| p1  | 0.0000  | 0.0000  | -0.3001 |
| i2  | 0.0000  | 0.0000  | 2.0492  |
| br3 | 1.0020  | -1.7355 | -1.0460 |
| br4 | 1.0020  | 1.7355  | -1.0460 |
| br5 | -2.0040 | 0.0000  | -1.0460 |

dist 1 p -- 3 br = 4.0409 au = 213.83 pm

dist 1 p -- 2 i = 4.4395 au = 234.93 pm

bend 2 i -> 1 p <- 3 br = 110.42 deg

bend 3 br -> 1 p <- 4 br = 108.51 deg

cycle = 9 MP2 energy = -8069.7444975526 |dE/dxyz| = 0.000047

zero point VIBRATIONAL energy : 0.0048016 Hartree

### \$vibrational spectrum

| # mode # | symmetry | wave number<br>cm**(-1) | IR intensity<br>km/mol | IR  | selection rules<br>RAMAN |
|----------|----------|-------------------------|------------------------|-----|--------------------------|
| 1        |          | 0.00                    | 0.00000                | -   | -                        |
| 2        |          | 0.00                    | 0.00000                | -   | -                        |
| 3        |          | 0.00                    | 0.00000                | -   | -                        |
| 4        |          | 0.00                    | 0.00000                | -   | -                        |
| 5        |          | 0.00                    | 0.00000                | -   | -                        |
| 6        |          | 0.00                    | 0.00000                | -   | -                        |
| 7        | e        | 79.76                   | 0.00105                | YES | YES                      |
| 8        | e        | 79.76                   | 0.00105                | YES | YES                      |
| 9        | a1       | 122.26                  | 0.45237                | YES | YES                      |
| 10       | e        | 127.48                  | 0.47920                | YES | YES                      |
| 11       | e        | 127.48                  | 0.47920                | YES | YES                      |
| 12       | a1       | 218.80                  | 0.74512                | YES | YES                      |
| 13       | a1       | 425.22                  | 119.65045              | YES | YES                      |
| 14       | e        | 463.45                  | 100.99294              | YES | YES                      |
| 15       | e        | 463.45                  | 100.99294              | YES | YES                      |

| T (K) | p (MPa) | ln(qtrans) | ln(qrot) | ln(qvib) | chem.pot. (kJ/mol) | energy (kJ/mol) | entropy (kJ/mol/K) |
|-------|---------|------------|----------|----------|--------------------|-----------------|--------------------|
|-------|---------|------------|----------|----------|--------------------|-----------------|--------------------|

298.15 0.100000 19.58 13.90 5.44 -83.87 32.99 0.40027

### \$cosmo\_energy

Total energy [a.u.] = -8074.9910309556

Total energy + OC corr. [a.u.] = -8074.9888002790

Total energy corrected [a.u.] = -8074.9899156173 Note: incorrect value contained for downward compatibility

Dielectric energy [a.u.] = -0.0662126667

Diel. energy + OC corr. [a.u.] = -0.0639819901



### PI<sub>4</sub><sup>+</sup>

sy td

p1 0.0000 0.0000 0.0000  
i2 1.3699 -1.3699 1.3699

dist 1 p -- 2 i = 4.4837 au = 237.27 pm

bend 2 i -> 1 p <- 3 i = 109.47 deg

cycle = 7 MP2 energy = -385.9825073972 |dE/dxyz| = 0.000000

zero point VIBRATIONAL energy : 0.0037725 Hartree

### \$vibrational spectrum

| #  | mode | symmetry | wave number | IR intensity | selection rules |
|----|------|----------|-------------|--------------|-----------------|
| #  |      | cm**(-1) | km/mol      | IR           | RAMAN           |
| 1  |      | 0.00     | 0.00000     | -            | -               |
| 2  |      | 0.00     | 0.00000     | -            | -               |
| 3  |      | 0.00     | 0.00000     | -            | -               |
| 4  |      | 0.00     | 0.00000     | -            | -               |
| 5  |      | 0.00     | 0.00000     | -            | -               |
| 6  |      | 0.00     | 0.00000     | -            | -               |
| 7  | e    | 58.53    | 0.00000     | NO           | YES             |
| 8  | e    | 58.53    | 0.00000     | NO           | YES             |
| 9  | t2   | 91.35    | 0.05114     | YES          | YES             |
| 10 | t2   | 91.35    | 0.05114     | YES          | YES             |
| 11 | t2   | 91.35    | 0.05114     | YES          | YES             |
| 12 | a1   | 158.93   | 0.00000     | NO           | YES             |
| 13 | t2   | 368.64   | 91.27787    | YES          | YES             |
| 14 | t2   | 368.64   | 91.27787    | YES          | YES             |
| 15 | t2   | 368.64   | 91.27787    | YES          | YES             |

T p ln(qtrans) ln(qrot) ln(qvib) chem.pot. energy entropy  
(K) (MPa) (kJ/mol) (kJ/mol) (kJ/mol/K)

298.15 0.1000000 20.04 13.28 7.08 -90.23 31.89 0.41787

### \$cosmo\_energy

Total energy [a.u.] = -386.9601449132

Total energy + OC corr. [a.u.] = -386.9569902362

Total energy corrected [a.u.] = -386.9585675747 Note: incorrect value contained for downward compatibility

Dielectric energy [a.u.] = -0.0643714261

Diel. energy + OC corr. [a.u.] = -0.0612167492

## C<sub>2</sub>I<sub>4</sub>

sy d2h

|    |         |         |        |
|----|---------|---------|--------|
| c1 | 0.6765  | 0.0000  | 0.0000 |
| c2 | -0.6765 | 0.0000  | 0.0000 |
| i3 | 1.8184  | 1.7486  | 0.0000 |
| i4 | -1.8184 | -1.7486 | 0.0000 |
| i5 | 1.8184  | -1.7486 | 0.0000 |
| i6 | -1.8184 | 1.7486  | 0.0000 |

dist 1 c -- 2 c = 2.5570 au = 135.31 pm

dist 1 c -- 3 i = 3.9465 au = 208.84 pm

bend 1 c -> 2 c <- 3 i = 35.03 deg

bend 2 c -> 1 c <- 3 i = 123.15 deg

bend 3 i -> 2 c <- 5 i = 70.05 deg

cycle = 8 MP2 energy = -121.3128432569 |dE/dxyz| = 0.000004

zero point VIBRATIONAL energy : 0.0105580 Hartree

### \$vibrational spectrum

| # mode | symmetry | wave number | IR intensity | selection rules |
|--------|----------|-------------|--------------|-----------------|
| #      |          | cm**(-1)    | km/mol       | IR RAMAN        |
| 1      |          | 0.00        | 0.00000      | - -             |
| 2      |          | 0.00        | 0.00000      | - -             |
| 3      |          | 0.00        | 0.00000      | - -             |
| 4      |          | 0.00        | 0.00000      | - -             |
| 5      |          | 0.00        | 0.00000      | - -             |
| 6      |          | 0.00        | 0.00000      | - -             |
| 7      | au       | 35.38       | 0.00000      | NO NO           |
| 8      | b2u      | 85.98       | 0.00427      | YES NO          |
| 9      | ag       | 101.46      | 0.00000      | NO YES          |
| 10     | b3u      | 125.20      | 0.26769      | YES NO          |
| 11     | b1g      | 142.52      | 0.00000      | NO YES          |
| 12     | ag       | 177.57      | 0.00000      | NO YES          |
| 13     | b1u      | 210.02      | 6.70288      | YES NO          |
| 14     | b2g      | 422.28      | 0.00000      | NO YES          |
| 15     | b3u      | 506.34      | 20.06573     | YES NO          |
| 16     | b2u      | 606.21      | 92.82432     | YES NO          |
| 17     | b1g      | 730.83      | 0.00000      | NO YES          |
| 18     | ag       | 1490.66     | 0.00000      | NO YES          |

| T   | p     | ln(qtrans) | ln(qrot) | ln(qvib) | chem.pot. | energy   | entropy    |
|-----|-------|------------|----------|----------|-----------|----------|------------|
| (K) | (MPa) |            |          |          | (kJ/mol)  | (kJ/mol) | (kJ/mol/K) |

|        |           |       |       |      |        |       |         |
|--------|-----------|-------|-------|------|--------|-------|---------|
| 298.15 | 0.1000000 | 20.02 | 14.44 | 6.69 | -74.29 | 49.90 | 0.42484 |
|--------|-----------|-------|-------|------|--------|-------|---------|
